# Supplementary material for: Androgens In Men Study (AIMS): protocol for meta-analyses of individual participant data investigating associations of androgens with health outcomes in men
Source: PubMed Central journal article supplement (PMC7239545; doi:10.1136/bmjopen-2019-034777), 2020-05-11
Supplement: bmjopen-2019-034777.draft_revisions.pdf [file bmjopen-2019-034777.draft_revisions.pdf]

# BMJ Open

BMJ Open is committed to open peer review. As part of this commitment we make the peer review history of every article we publish publicly available.

When an article is published we post the peer reviewers' comments and the authors' responses online. We also post the versions of the paper that were used during peer review. These are the versions that the peer review comments apply to.

The versions of the paper that follow are the versions that were submitted during the peer review process. They are not the versions of record or the final published versions. They should not be cited or distributed as the published version of this manuscript.

BMJ Open is an open access journal and the full, final, typeset and author-corrected version of record of the manuscript is available on our site with no access controls, subscription charges or pay-per-view fees (<http://bmjopen.bmj.com>).

If you have any questions on BMJ Open's open peer review process please email [info.bmjopen@bmj.com](mailto:info.bmjopen@bmj.com)

# BMJ Open

## Androgens In Men Study (AIMS): protocol for meta-analyses of individual participant data investigating associations of androgens with health outcomes in men.

|                               |                                                                                                                                                                                                                                                                                                                                                                                                                                                                                                                                                                                                                                                                                                                                                                                                                                                                                                                                                                                                                                                                                                                                                                                                                                                                                                                                                                                                                                                                                                                                                                                                                                                                                                                                                                                                                                                                                                                                                                                                                                                                                                                                                                                                                                                                                                                                                            |
|-------------------------------|------------------------------------------------------------------------------------------------------------------------------------------------------------------------------------------------------------------------------------------------------------------------------------------------------------------------------------------------------------------------------------------------------------------------------------------------------------------------------------------------------------------------------------------------------------------------------------------------------------------------------------------------------------------------------------------------------------------------------------------------------------------------------------------------------------------------------------------------------------------------------------------------------------------------------------------------------------------------------------------------------------------------------------------------------------------------------------------------------------------------------------------------------------------------------------------------------------------------------------------------------------------------------------------------------------------------------------------------------------------------------------------------------------------------------------------------------------------------------------------------------------------------------------------------------------------------------------------------------------------------------------------------------------------------------------------------------------------------------------------------------------------------------------------------------------------------------------------------------------------------------------------------------------------------------------------------------------------------------------------------------------------------------------------------------------------------------------------------------------------------------------------------------------------------------------------------------------------------------------------------------------------------------------------------------------------------------------------------------------|
| Journal:                      | <i>BMJ Open</i>                                                                                                                                                                                                                                                                                                                                                                                                                                                                                                                                                                                                                                                                                                                                                                                                                                                                                                                                                                                                                                                                                                                                                                                                                                                                                                                                                                                                                                                                                                                                                                                                                                                                                                                                                                                                                                                                                                                                                                                                                                                                                                                                                                                                                                                                                                                                            |
| Manuscript ID                 | bmjopen-2019-034777                                                                                                                                                                                                                                                                                                                                                                                                                                                                                                                                                                                                                                                                                                                                                                                                                                                                                                                                                                                                                                                                                                                                                                                                                                                                                                                                                                                                                                                                                                                                                                                                                                                                                                                                                                                                                                                                                                                                                                                                                                                                                                                                                                                                                                                                                                                                        |
| Article Type:                 | Protocol                                                                                                                                                                                                                                                                                                                                                                                                                                                                                                                                                                                                                                                                                                                                                                                                                                                                                                                                                                                                                                                                                                                                                                                                                                                                                                                                                                                                                                                                                                                                                                                                                                                                                                                                                                                                                                                                                                                                                                                                                                                                                                                                                                                                                                                                                                                                                   |
| Date Submitted by the Author: | 05-Oct-2019                                                                                                                                                                                                                                                                                                                                                                                                                                                                                                                                                                                                                                                                                                                                                                                                                                                                                                                                                                                                                                                                                                                                                                                                                                                                                                                                                                                                                                                                                                                                                                                                                                                                                                                                                                                                                                                                                                                                                                                                                                                                                                                                                                                                                                                                                                                                                |
| Complete List of Authors:     | <p>Yeap, Bu; University of Western Australia, Medical School; Fiona Stanley Hospital, Department of Endocrinology and Diabetes<br/> Marriott, Ross; University of Western Australia, School of Population and Global Health<br/> Adams, Robert; Flinders University, Adelaide Institute for Sleep Health<br/> Antonio, Leen; KU Leuven, Clinical and Experimental Endocrinology<br/> Ballantyne, Christie; Baylor College of Medicine, Internal Medicine<br/> Bhasin, Shalender; Harvard Medical School<br/> Cawthon, PM; California Pacific Medical Center Research Institute, San Francisco Coordinating Center<br/> Couper, David; University of North Carolina at Chapel Hill, Gillings School of Global Public Health<br/> Dobs, Adrian; Johns Hopkins University, School of Medicine, Division of Endocrinology, Diabetes and Metabolism<br/> Flicker, Leon; University of Western Australia, WA Centre for Health &amp; Ageing<br/> Karlsson, Magnus; Lund University, Department of Clinical Sciences and Orthopedic Surgery<br/> Martin, Sean A.; The University of Adelaide, Freemasons Foundation Centre for Men's Health<br/> Matsumoto, AM; VA Puget Sound Health Care System, Geriatric Research, Education and Clinical Center; University of Washington System, Medicine<br/> Mellström, Dan ; University of Gothenburg, Centre for Bone and Arthritis Research at the Sahlgrenska Academy, Institute of Medicine<br/> Norman, Paul; University of Western Australia, Medical School<br/> Ohlsson , C; University of Gothenburg, Centre for Bone and Arthritis Research at the Sahlgrenska Academy, Institute of Medicine<br/> Orwoll, Eric; Oregon Health &amp; Science University<br/> O'Neill, Terence; The University of Manchester &amp; NIHR Manchester Biomedical Research Centre, Centre for Epidemiology Versus Arthritis, Faculty of Biology, Medicine and Health; Manchester Academic Health Science Centre, Manchester University NHS Foundation Trust<br/> Shores, Molly; VA Puget Sound Health Care System; University of Washington, School of Medicine, Department of Psychiatry and Behavioral Sciences<br/> Travison, Thomas; Beth Israel Deaconess Medical Center, Institute for Aging Research, Hebrew SeniorLife; Harvard Medical School<br/> Vanderschueren, Dirk; Katholieke Universiteit Leuven, Department of</p> |

1  
2  
3  
4  
5  
6  
7  
8  
9  
10  
11  
12  
13  
14  
15  
16  
17  
18  
19  
20  
21  
22  
23  
24  
25  
26  
27  
28  
29  
30  
31  
32  
33  
34  
35  
36  
37  
38  
39  
40  
41  
42  
43  
44  
45  
46  
47  
48  
49  
50  
51  
52  
53  
54  
55  
56  
57  
58  
59  
60

|           |                                                                                                                                                                                                                                                                                                                                                                                               |
|-----------|-----------------------------------------------------------------------------------------------------------------------------------------------------------------------------------------------------------------------------------------------------------------------------------------------------------------------------------------------------------------------------------------------|
|           | Chronic Diseases, Metabolism and Ageing (CHROMETA), Laboratory of Clinical and Experimental Endocrinology<br>Wittert, Gary; The University of Adelaide, Freemasons Centre for Men's Health<br>Wu, Frederick; The University of Manchester, Division of Diabetes, Endocrinology and Gastroenterology<br>Murray, Kevin; University of Western Australia, School of Population and Global Health |
| Keywords: | Sex steroids & HRT < DIABETES & ENDOCRINOLOGY, EPIDEMIOLOGY, General endocrinology < DIABETES & ENDOCRINOLOGY                                                                                                                                                                                                                                                                                 |
|           |                                                                                                                                                                                                                                                                                                                                                                                               |

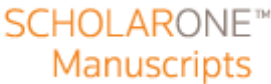

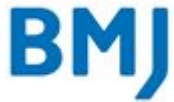

I, the Submitting Author has the right to grant and does grant on behalf of all authors of the Work (as defined in the below author licence), an exclusive licence and/or a non-exclusive licence for contributions from authors who are: i) UK Crown employees; ii) where BMJ has agreed a CC-BY licence shall apply, and/or iii) in accordance with the terms applicable for US Federal Government officers or employees acting as part of their official duties; on a worldwide, perpetual, irrevocable, royalty-free basis to BMJ Publishing Group Ltd ("BMJ") its licensees and where the relevant Journal is co-owned by BMJ to the co-owners of the Journal, to publish the Work in this journal and any other BMJ products and to exploit all rights, as set out in our [licence](#).

The Submitting Author accepts and understands that any supply made under these terms is made by BMJ to the Submitting Author unless you are acting as an employee on behalf of your employer or a postgraduate student of an affiliated institution which is paying any applicable article publishing charge ("APC") for Open Access articles. Where the Submitting Author wishes to make the Work available on an Open Access basis (and intends to pay the relevant APC), the terms of reuse of such Open Access shall be governed by a Creative Commons licence – details of these licences and which [Creative Commons](#) licence will apply to this Work are set out in our licence referred to above.

Other than as permitted in any relevant BMJ Author's Self Archiving Policies, I confirm this Work has not been accepted for publication elsewhere, is not being considered for publication elsewhere and does not duplicate material already published. I confirm all authors consent to publication of this Work and authorise the granting of this licence.

1  
2  
3 1 Androgens In Men Study (AIMS): protocol for meta-analyses of individual participant data  
4  
5 2 investigating associations of androgens with health outcomes in men.  
6  
7  
8 3

9  
10 4 Corresponding author

11  
12 5 Dr Bu B. Yeap MBBS, FRACP, PhD, Harry Perkins Institute of Medical Research, 11 Robin  
13  
14 6 Warren Drive, Murdoch 6150, Western Australia, Australia.

15  
16  
17 7 Email: [bu.yeap@uwa.edu.au](mailto:bu.yeap@uwa.edu.au); Telephone: +61 8 6151 1149  
18  
19 8

20  
21 9 Authors:

22  
23  
24 10 Bu B. Yeap, Medical School, The University of Western Australia, Perth 6009, Australia.

25  
26 11 Ross J. Marriott, School of Population and Global Health, The University of Western  
27  
28 12 Australia, Perth 6009, Australia.

29  
30 13 Robert J. Adams, Adelaide Institute for Sleep Health, Flinders University, Bedford Park  
31  
32 14 5042, Australia.

33  
34  
35 15 Leen Antonio, Clinical and Experimental Endocrinology, KU Leuven, Leuven, Belgium.

36  
37 16 Christie M. Ballantyne, Internal Medicine, Baylor College of Medicine, Houston, Texas,  
38  
39 17 USA.

40  
41  
42 18 Shalender Bhasin, Harvard Medical School, Boston, Massachusetts, USA.

43  
44 19 Peggy M. Cawthon, San Francisco Coordinating Center, California Pacific Medical Center  
45  
46 20 Research Institute, San Francisco, California, USA.

47  
48  
49 21 David J. Couper, Gillings School of Global Public Health, University of North Carolina at  
50  
51 22 Chapel Hill, Chapel Hill, North Carolina, USA.

52  
53  
54 23 Adrian S. Dobs, School of Medicine, Division of Endocrinology, Diabetes and Metabolism,  
55  
56 24 Johns Hopkins University, Baltimore, Maryland, USA.  
57  
58  
59  
60

- 1  
2  
3 25 Leon Flicker, WA Centre for Health & Ageing, The University of Western Australia, Perth  
4  
5 26 6009, Australia.  
6  
7 27 Magnus Karlsson, Department of Clinical Sciences and Orthopedic Surgery, Lund  
8  
9 28 University, Lund, Sweden.  
10  
11  
12 29 Sean A. Martin, Freemasons Foundation Centre for Men's Health, The University of  
13  
14 30 Adelaide, Adelaide 5000, Australia.  
15  
16 31 Alvin M. Matsumoto, Geriatric Research, Education and Clinical Center, VA Puget Sound  
17  
18 32 Health Care System, Seattle, Washington, USA.  
19  
20 21 33 Dan Mellström, Centre for Bone and Arthritis Research at the Sahlgrenska Academy,  
22  
23 34 Institute of Medicine, University of Gothenburg, Goteburg, Sweden.  
24  
25 26 35 Paul E. Norman, Medical School, The University of Western Australia, Fremantle 6160,  
27  
28 36 Australia.  
29  
30 31 37 Claes Ohlsson, Centre for Bone and Arthritis Research at the Sahlgrenska Academy, Institute  
32  
33 38 of Medicine, University of Gothenburg, Goteburg, Sweden.  
34  
35 39 Eric S. Orwoll, Oregon Health & Science University, Portland, Oregon, USA.  
36  
37 40 Terence W. O'Neill, Centre for Epidemiology Versus Arthritis, Faculty of Biology, Medicine  
38  
39 41 and Health, The University of Manchester & NIHR Biomedical Research Centre,  
40  
41 42 Manchester, United Kingdom.  
42  
43 44 43 Molly M. Shores, VA Puget Sound Health Care System, Seattle, Washington, United States.  
44  
45 46 44 Thomas G. Travison, Institute for Aging Research, Hebrew SeniorLife, Beth Israel  
47  
48 45 Deaconess Medical Center, Boston, Massachusetts, USA.  
49  
50 51 46 Dirk Vanderschueren, Department of Chronic Diseases, Metabolism and Ageing  
52  
53 47 (CHROMETA), Laboratory of Clinical and Experimental Endocrinology, Katholieke  
54  
55 48 Universiteit Leuven, Leuven, Flanders, Belgium.  
56  
57  
58  
59  
60

1  
2  
3 49 Gary A. Wittert, Freemasons Foundation Centre for Men's Health, The University of  
4  
5 50 Adelaide, Adelaide 5000, Australia.  
6  
7 51 Frederick C. W. Wu., Division of Diabetes, Endocrinology and Gastroenterology, The  
8  
9 52 University of Manchester, Manchester, United Kingdom.  
10  
11  
12 53 Kevin Murray, School of Population and Global Health, The University of Western Australia,  
13  
14 54 Perth 6009, Australia.  
15  
16  
17 55  
18  
19 56 Word count, excluding title page, abstract, references, acknowledgements, contributions,  
20  
21 figures and tables:  
22  
23  
24 58  
25  
26 59 3,374 words.  
27  
28  
29 60  
30  
31 61

## 62 **ABSTRACT**

### 63 **Introduction**

64 This study aims to clarify the role(s) of endogenous sex hormones to influence health  
65 outcomes in men, specifically to define the associations of plasma testosterone with incidence  
66 of cardiovascular events, cancer, dementia and mortality risk, and to identify factors  
67 predicting testosterone concentrations. Data will be accrued from at least three Australian,  
68 two European, and four North American population-based cohorts involving approximately  
69 20,000 men.

### 70 **Methods and analysis**

71 Eligible studies include prospective cohort studies with baseline testosterone concentrations  
72 measured using mass spectrometry and five years of follow-up data on incident  
73 cardiovascular events, mortality, cancer diagnoses or deaths, new onset dementia, or decline  
74 in cognitive function recorded. Data for men, who were not taking androgens or drugs  
75 suppressing testosterone production, metabolism, or action; and had no prior orchidectomy,  
76 are eligible. The date range of bibliographic searches will not be constrained, and aggregate  
77 level data will be sought where individual participant data (IPD) is not available. One-stage  
78 IPD random-effects meta-analyses will be performed, using linear mixed models, generalised  
79 linear mixed models and either stratified or frailty-augmented Cox regression models.  
80 Heterogeneity in estimates from different studies will be quantified and bias investigated  
81 using funnel plots. Effect size estimates will be presented in forest plots and non-negligible  
82 heterogeneity and bias investigated using subgroup or meta-regression analyses.

### 83 **Ethics and dissemination**

84 Ethics approvals obtained for each of the participating cohorts state that participants have  
85 consented to have their data collected and used for research purposes. There are four planned  
86 research articles, with each involving a separate set of IPD meta-analyses.



1  
2  
3 87 **Registration** [Systematic Review Protocol ID 139668 submitted to Prospero on 23 July 2019  
4  
5 88 and is presently being assessed].  
6  
7  
8 89

9  
10 90 **STRENGTHS AND LIMITATIONS OF THIS STUDY**  
11

- 12 91 • A large international collaboration combining data from multiple cohorts will enable  
13  
14 92 definitive analyses whose results possess global applicability. Investigators from at least  
15  
16 93 three large Australian, two European, and four North American cohorts (each with N >  
17  
18 94 1,000 participants), which have IPD-level data available, have agreed to collaborate and  
19  
20 95 confirmed availability of suitable IPD-level data, provisional on approvals from their  
21  
22 96 local IRBs. Aggregate level data will be sought in the event IPD-level data are not  
23  
24 97 available.  
25  
26 98 • Harmonization will be required for some variables (e.g., physical activity, alcohol  
27  
28 99 consumption) that are recorded differently by the component studies.  
29  
30  
31 100 • Analyses will allow reference ranges for testosterone in men across ages and geographical  
32  
33 101 locations to be refined to inform recommendations for clinical practice.  
34  
35  
36  
37  
38 102

## 103 INTRODUCTION

104 As men grow older, testosterone production and circulating concentrations of testosterone  
105 decline while comorbidities accumulate.[1-4] Older men, even those in very good health,  
106 have lower circulating testosterone concentrations compared with healthy young men.[5, 6]  
107 Although results have been inconsistent, an increasing number of studies have reported  
108 associations of low endogenous testosterone concentration with poorer health outcomes,  
109 especially in older men. For instance, studies that have used liquid chromatography tandem  
110 mass spectrometry, widely regarded as the reference method for the measurement of total  
111 testosterone concentrations,[7] have reported associations of lower endogenous testosterone  
112 concentrations with: (i) cardiovascular disease and all-cause mortality in some cases[8-15]  
113 but not others[8, 16-20]; (ii) some cancers but not others[21, 22]; and (iii) dementia[23, 24]  
114 but not laboratory measures of cognitive function.[25] Therefore it remains unclear whether  
115 testosterone is a biomarker of ill-health or a causal factor for diseases of ageing.  
116  
117 Currently, testosterone treatment is recommended for men who have symptoms and signs of  
118 androgen deficiency and low testosterone concentrations, due to disease of the hypothalamus,  
119 pituitary or testes (organic or pathological hypogonadism).[26-29] Randomised controlled  
120 trials of testosterone treatment in older men with low-normal testosterone concentrations  
121 without organic hypogonadism have shown modest benefits on sexual function, anaemia,  
122 self-reported physical function and mobility, and volumetric bone density, but not on some  
123 objective measures of cognition over 12 to 36 months.[30-34] The effect of testosterone on  
124 major adverse cardiovascular events remains unclear.[35, 36] However, the selection criteria  
125 of these trials was such that the screening to enrolment ratio was 65:1, a highly selected  
126 population of older men.[32, 33, 36] Importantly, the trials were neither large enough nor  
127 long enough to determine the effects of testosterone on major adverse cardiovascular events,

1  
2  
3 128 development of dementia, bone fractures, and mortality.[36] Therefore, a meta-analysis of  
4  
5 129 data from prospective cohort studies, with extended follow-up periods, provides opportunities  
6  
7  
8 130 for better understanding of the temporal profiles of the postulated associations between  
9  
10 131 endogenous testosterone concentration and incident health outcomes. Meta-analyses of  
11  
12 132 Individual Participant Data (IPD) are generally preferable to meta-analyses of aggregate data  
13  
14 133 in that they typically have higher statistical power and provide scope to control for important  
15  
16  
17 134 confounders and risk factors.[37, 38] Furthermore, one-stage IPD meta-analyses are  
18  
19 135 preferable to two-stage approaches because the former uses an exact likelihood to directly  
20  
21 136 model the distribution of IPD, offers the convenience of using a standard set of diagnostic  
22  
23  
24 137 tools to assess model fit, and can arguably provide greater flexibility, in terms of options for  
25  
26 138 statistical modelling.[39, 40]

27  
28 139  
29  
30  
31 140 The Androgens In Men Study (AIMS), an international collaboration of prospective cohort  
32  
33 141 studies, will examine the associations of sex hormones with health outcomes that are major  
34  
35 142 sources of morbidity and mortality in middle-aged and older men. The group will perform a  
36  
37 143 series of IPD meta-analyses to clarify the influence of sex hormone exposures on major  
38  
39  
40 144 health outcomes, including heart attack, stroke and cardiovascular deaths, cancer, new-onset  
41  
42 145 dementia, and all-cause mortality, as well as provide information on social, demographic and  
43  
44 146 behavioural factors that are associated with endogenous testosterone concentrations. This  
45  
46  
47 147 work will characterise robustly the associations of androgens with health outcomes in men in  
48  
49 148 general over and above the study-specific estimates, thus clarifying the role of androgens as  
50  
51 149 biomarkers for, or causal contributors to, men's health.

52  
53  
54 150  
55  
56  
57  
58  
59  
60

1  
2  
3 **151 Objectives**  
4

5 152 The Androgens In Men Study (AIMS) will establish an international collaboration of existing  
6  
7 153 cohort studies to clarify the relation of endogenous sex hormones with major health outcomes  
8  
9  
10 154 in men. PEO (Population, Exposure, Outcomes) characteristics include: adult men in the  
11  
12 155 general community; an exposure of endogenous circulating sex hormone concentration,  
13  
14 156 primarily testosterone, as the principal male sex hormone or androgen; and a prospective  
15  
16  
17 157 cohort study type, with incident health outcomes including incidence of cardiovascular  
18  
19 158 disease events, mortality, cancers, and dementia. The specific objectives of the AIMS study  
20  
21 159 are: to investigate associations between variables representing social, demographic, and  
22  
23 160 behavioural factors with the measured concentration of androgens in the blood of men  
24  
25  
26 161 (Analysis 1); to examine the associations between androgen concentrations and subsequent  
27  
28 162 incidence of cardiovascular events, cardiovascular deaths, and all-cause mortality in men  
29  
30 163 (Analysis 2); to examine the associations between androgen concentrations and subsequent  
31  
32 164 mortality from (and, if available, diagnoses of) common cancers in men (Analysis 3); to  
33  
34 165 examine the associations between androgen concentrations and cognitive impairment and  
35  
36 166 incident dementia in men (Analysis 4). Analysis 2 will evaluate myocardial infarction, stroke  
37  
38 167 and heart failure, deaths due to cardiovascular disease, and the composite endpoint of major  
39  
40 168 adverse cardiovascular events (MACE) comprising non-fatal myocardial infarction, non-fatal  
41  
42 169 stroke, and deaths due to cardiovascular disease. Analysis 3 will evaluate outcomes of deaths  
43  
44 170 due to and diagnoses of colorectal cancer, lung cancer and prostate cancer.  
45  
46  
47  
48  
49

50  
51  
52  
53  
54  
55  
56  
57  
58  
59  
60  
171

## 172 **METHODS AND ANALYSIS**

173 IPD meta-analyses will be conducted to understand the associations between testosterone and  
174 a range of associated major health outcomes in men. IPD meta-analyses have been selected  
175 as the most suitable approach because: (i) the required aggregate data (AD) are not available  
176 from each of the cohorts in published literature; (ii) IPD meta-analyses typically have higher  
177 statistical power than AD meta-analyses and provide scope for controlling for important  
178 confounders and risk factors.[37, 38] Where possible, methods will adhere to the guidelines  
179 for Preferred Reporting Items for Systematic Reviews and Meta-Analyses of IPD data  
180 (PRISMA-IPD; completed checklist is provided in Supplementary Material) and the Meta-  
181 analysis Of Observational Studies in Epidemiology (MOOSE).[41-43]

182

### 183 **Studies selected for inclusion in IPD meta-analyses**

184 Studies will be identified from a systematic review using online search tools for mainstream  
185 published (MEDLINE, EMBASE) and grey literature (OpenGrey, Mednar) studies (Prospero  
186 application for registration No. 139668 submitted 23 July 2019). Eligible studies include  
187 prospective cohort studies with plasma or serum testosterone concentrations measured using  
188 mass spectrometry with at least five years of follow-up data, with incident cardiovascular,  
189 cancer, mortality, dementia, or cognitive events recorded (see Supplementary Table S1 for an  
190 example of search criteria to be used). The search strategy selects for articles based on words  
191 or Medical Subject Headings (MeSH) terms matching the relevant exposure (example steps  
192 1-3), outcomes (example steps 4-10), and study type (example steps 14-15), then, depending  
193 on the search tool, filters down to more relevant studies, with exclusions of clinical trials and  
194 of studies on non-humans (example steps 18-27), with no date range restrictions. Ahead of  
195 the systematic review, nine eligible studies (cohorts) had expressed interest to collaborate:  
196 three from Australia (Busselton Health Study BHS, Health In Men Study HIMS, Men

1  
2  
3 197 Androgen Inflammation Lifestyle Environment and Stress study MAILES); two from Europe  
4  
5 198 (European Male Ageing Study EMAS, Osteoporotic Fractures in Men Study MrOS -  
6  
7  
8 199 Sweden); and four from the USA (Atherosclerosis Risk in Communities study ARIC,  
9  
10 200 Cardiovascular Health Study CHS, The Framingham Heart Study FHS, Osteoporotic  
11  
12 201 Fractures in Men Study MrOS - USA). Investigators from eight of these studies have  
13  
14 202 confirmed availability of suitable IPD-level data, provisional on approvals from their  
15  
16  
17 203 respective Publication and Steering Committees. If it is not possible to obtain IPD-level data  
18  
19 204 from selected studies, we will request suitable AD-level data.  
20  
21  
22 205

### 23 24 206 **Data provision, merging, harmonisation, and storage**

25  
26 207 The project manager will liaise directly with the nominated contact person for each cohort  
27  
28 208 study to identify, specifically, which variables and set of observations will be suitable to  
29  
30 209 request. A data request will then be submitted to the data custodian for each study. Requested  
31  
32  
33 210 variables will be labelled as either “highly desirable” or “only if available”, in order to  
34  
35 211 prioritise efforts in obtaining the key variables for analyses and to acknowledge the differing  
36  
37 212 availability of variables among studies. A list of variable names, definitions, and attributes,  
38  
39 213 including numbers of rows and columns in each data file(s) will also be requested to be  
40  
41  
42 214 provided separately. Methods for ascertaining outcome and comorbidity status will be  
43  
44 215 requested, which can be used to indicate the relative quality of diagnostic information (e.g.  
45  
46 216 ICD-coded diagnoses from hospital inpatient admissions versus self-report information). File  
47  
48 217 transfer will be achieved via encrypted file transfer (or other sufficiently secure method).  
49  
50

51 218  
52  
53 219 Once each dataset has been received by the project manager, the original file(s) will be saved  
54  
55 220 and date-stamped in a secure central repository. All subsequent manipulations will be  
56  
57 221 completed using copies of the original file, with syntax saved as script files. Variable  
58  
59  
60

1  
2  
3 222 definitions will be checked, variables inspected for missing values, and variable properties  
4  
5 223 and value ranges assessed to identify possible outliers. A table of summary statistics will be  
6  
7  
8 224 calculated and, where possible, analyses run and compared with published values to check for  
9  
10 225 data consistency. The nature of any discrepancies identified from these checks will need to be  
11  
12 226 understood, and possibly resolved, prior to proceeding with the meta-analyses.[42, 44, 45]  
13  
14 227 Missing data will be suitably imputed.[45, 46]  
15  
16  
17 228  
18  
19  
20 229 Prior to the merging of datasets, a variable to identify each source study will be appended as  
21  
22 230 the new first column. Variable formats will be checked and corrected for consistency and  
23  
24 231 anonymised participant identifier codes for uniqueness across all studies. Harmonization will  
25  
26 232 be required for some variables (e.g., physical activity, alcohol consumption) that are recorded  
27  
28 233 differently by the different component studies. Where possible, AD datasets will be used to  
29  
30 234 reconstruct IPD-level data (that is, partially-reconstructed IPD) prior to merging.[47-49]  
31  
32  
33 235 Should this not be possible, the IPD-level data will be aggregated and summary estimates  
34  
35 236 made with and without AD-level data as sensitivity analyses. It is also possible that some  
36  
37 237 studies might have outcomes available for some analyses, but not others; in these cases, we  
38  
39 238 will preferentially use IPD-level data when available but also seek to use AD-level data from  
40  
41 239 those other studies when available. There is no requirement to use IPD-level data from the  
42  
43 240 same studies across all analyses.  
44  
45  
46 241  
47  
48  
49 242 All IPD-level data will be accessible to only the approved staff from a secure on-site facility,  
50  
51 243 from rooms that are kept locked when unattended, and with remote access not permitted.  
52  
53 244 IPD-level data are not to be printed in hard copy and will only be presented at aggregate  
54  
55 245 level. Data analysed for this study will be retained for five years after the last of all proposed  
56  
57 246 analyses are published and will then be destroyed. A post-analysis retention period is required  
58  
59  
60

1  
2  
3 247 to enable publication and possible scrutiny of findings. Disposal will be carried out according  
4  
5 248 to best practice.  
6  
7

8 249  
9

## 10 11 250 **Data items**

12  
13  
14 251 The full list of generic variables to include in meta-analyses are presented in Table 1.

15  
16 252 Analysis 1 will model relationships of androgen concentrations, as measured in serum or  
17  
18 253 plasma samples (dependent variable), with key demographic variables and risk factors for  
19  
20 254 disease (predictor variables). Time-to-event variables obtained from follow-up data will be  
21  
22 255 analysed in Analysis 2 and 3 (outcomes), and their associations with androgen concentrations  
23  
24 256 (focal predictor) and other potential confounders and risk factors (predictor variables).  
25  
26

27  
28 257 Records of dementia diagnoses (physician or otherwise categorised) and relative cognitive  
29  
30 258 function (for example, from test scores) will be analysed in Analysis 4, and their associations  
31  
32 259 with androgen concentrations and other potential confounders and risk factors. Androgen  
33  
34 260 variables will include measurements of total testosterone and, if available, of  
35  
36 261 dihydrotestosterone, estradiol, luteinising hormone (LH), and Sex Hormone Binding Globulin  
37  
38 262 (SHBG). For exploratory analyses, free testosterone, the amount in the circulation which is  
39  
40 263 not protein-bound, will be calculated from measured total testosterone and SHBG.[50]  
41  
42

43  
44 264 Covariates were selected to include those used in previous studies, as well as those that are  
45  
46 265 typically recorded. The full list of proposed variables to include in the meta-analyses are  
47  
48 266 presented in Table 1.  
49

50  
51 267  
52

## 53 54 268 **Statistical analysis**

55  
56 269 Since the datasets to be analysed are sampled from different populations, a random-effects  
57  
58 270 meta-analysis is appropriate, as it acknowledges that effects will vary among studies due to  
59  
60



1  
2  
3 271 differences in local factors.[51] One-stage IPD meta-analyses will be performed. Each IPD  
4  
5 272 meta-analysis will involve fitting a model with study estimated as either a fixed or random  
6  
7 273 term, to account for related observations within studies, and androgen modelled as random  
8  
9 274 slopes (when modelled as a continuous predictor) or intercepts (when modelled as a  
10  
11 275 categorical predictor), to harmonised, merged data from all cohorts. The underlying statistical  
12  
13 276 model and estimates of effect size will be specific to each of the proposed analyses and are  
14  
15 277 outlined as follows.  
16  
17  
18  
19  
20 278

21  
22  
23 279 *Analysis 1: Factors associated with testosterone concentrations in men and characterisation*  
24  
25 280 *of reference ranges.*  
26  
27

28 281 Linear Mixed Models (LMMs) or Generalised Linear Mixed Models (GLMMs) will be used  
29  
30 282 to model the relation between the predictors (independent variables) and each hormonal  
31  
32 283 variable (testosterone, dihydrotestosterone, estradiol, LH, SHBG) as five separate IPD meta-  
33  
34 284 analyses. Suspected non-linear relationships, at the scale of the linear predictor, will be  
35  
36 285 investigated and modelled appropriately (e.g., splines with pre-set knot locations and linear  
37  
38 286 boundary constraints). Measures of effect size may include (but are not limited to):  $\eta^2$ , [52,  
39  
40 287 53] Pearson's  $r$ , standardised mean difference to the reference level (categorical predictors),  
41  
42 288 standardised difference for an increase in one standard deviation (continuous predictors). In  
43  
44 289 the case of non-linear relations, we will graphically describe the relationship with  
45  
46 290 comparisons made with appropriate reference points. Reference ranges will be derived based  
47  
48 291 on the distributions of testosterone in healthy men.  
49  
50  
51  
52  
53  
54 292  
55  
56  
57  
58  
59  
60

1  
2  
3 293 *Analysis 2: Associations between testosterone concentrations and subsequent incidence of*  
4  
5 294 *cardiovascular events, cardiovascular deaths, and all-cause mortality.*

6  
7  
8 295 Cox proportional hazards models will be used to assess the effect of androgen level on the  
9  
10 296 incident risk of each outcome, with separate IPD meta-analyses conducted for each outcome  
11  
12 297 (myocardial infarction, stroke, heart failure, deaths due to cardiovascular disease, and  
13  
14 298 MACE) and each hormonal variable (testosterone, dihydrotestosterone, estradiol, LH,  
15  
16 299 SHBG). Component study will be modelled either as a stratified variable[39] or as a random  
17  
18 300 term, and androgen as a random term, using frailty models, which are a class of survival  
19  
20 301 models that incorporate random effects.[54-56] Participants with prevalent cardiovascular  
21  
22 302 disease at baseline will be excluded. The length of follow-up will also be standardised among  
23  
24 303 studies in order to maximise data from all datasets, whilst minimising the prospect for  
25  
26 304 variable lengths-to-follow-up among studies introducing additional heterogeneity into  
27  
28 305 results.[46]

29  
30  
31  
32  
33  
34 306  
35  
36  
37 307 Multivariable versions of each of these models will also be fitted, with additional predictors  
38  
39 308 for potential confounders and risk factors included (Table 1). Non-linear associations for  
40  
41 309 continuous variables will be modelled using natural splines with pre-specified knots and  
42  
43 310 linear boundary constraints. The (standardised) measure of effect size used will be the hazard  
44  
45 311 ratio. Subgroup analyses will be conducted separately for each of three specific types of  
46  
47 312 cardiovascular disease (outcomes): myocardial infarction, stroke and heart failure.

48  
49  
50  
51 313  
52  
53 314 *Analysis 3: Association between testosterone level and subsequent incidence of cancer.*

54  
55 315 Cox proportional hazards models will be used to assess the effect of androgen concentrations  
56  
57 316 on the incident risk of cancer deaths and, if available, of cancer diagnoses. IPD meta-analyses  
58  
59  
60

1  
2  
3 317 separately conducted for each of these outcomes and each hormonal variable as focal  
4  
5 318 predictor (testosterone, dihydrotestosterone, estradiol, LH, SHBG). Component study will be  
6  
7 319 modelled either as a stratified variable[39] or as a random term, and androgen as a random  
8  
9 320 term, using frailty models.[54-56] Participants with prevalent cancer diagnosis at baseline  
10  
11 321 will be excluded. The length of follow-up will be standardised among studies in order to  
12  
13 322 maximise data from all datasets, whilst minimising the prospect for variable lengths-to-  
14  
15 323 follow-up among studies introducing additional heterogeneity into results.[46]  
16  
17  
18  
19 324  
20  
21  
22 325 Multivariable versions of each of these models will also be fitted, with additional predictors  
23  
24 326 for potential confounders and risk factors included (Table 1). Non-linear associations for  
25  
26 327 continuous variables will be modelled using natural splines with pre-specified knots and  
27  
28 328 linear boundary constraints. The (standardised) measure of effect size used will be the hazard  
29  
30 329 ratio. Subgroup analyses will be conducted separately for each of three common types of  
31  
32 330 cancers in men (outcomes): colorectal cancer, lung cancer, prostate cancer. For these  
33  
34 331 analyses, men with the relevant cancer type at baseline will be excluded from that specific  
35  
36 332 analysis. Thus men with prevalent colorectal cancer (but not other cancer types) will be  
37  
38 333 excluded in the analysis of incident colorectal cancer; similarly for the analyses of incident  
39  
40 334 lung and prostate cancer, men with lung or prostate cancer at baseline will be excluded.  
41  
42  
43  
44  
45  
46  
47

48 336 *Analysis 4: Associations of androgen levels with cognitive impairment and incident dementia*  
49  
50 337 *in men.*

51  
52 338 LMMs and GLMMs will be used to model the association of androgen concentrations with  
53  
54 339 cognitive impairment (cross-sectional analyses of baseline data). Cox proportional hazards  
55  
56 340 models will be used to assess the effect of androgen concentrations on the incident risk of  
57  
58 341 dementia. Men with prevalent dementia will be excluded from this analysis. We will also ask  
59  
60

1  
2  
3 342 for follow-up cognition test scores, and if available, will run an analysis of changes in  
4  
5 343 cognition test scores from baseline as an outcome. Separate IPD meta-analyses will be  
6  
7 344 conducted for each hormonal variable as a focal predictor (testosterone, dihydrotestosterone,  
8  
9 345 estradiol, LH, SHBG). Component study will be modelled as a fixed or random intercept  
10  
11 346 term in LMMs and GLMMs and as a stratified factor or frailty model random term in Cox  
12  
13 347 regressions. Multivariable versions of each of these models will also be fitted, with additional  
14  
15 348 predictors for potential confounders and risk factors included (Table 1). Suspected non-linear  
16  
17 349 relationships, at the scale of the linear predictor, will be investigated and modelled using  
18  
19 350 splines with pre-specified knots and boundary constraints. Measures of effect size may  
20  
21 351 include:  $\eta^2$ , Pearson's  $r$ , standardised mean difference to the reference level (categorical  
22  
23 352 predictors), standardised difference for an increase in one standard deviation (continuous  
24  
25 353 predictors), odds ratio for LMMs and GLMMs and hazard ratio for Cox regressions.  
26  
27  
28  
29  
30

31 354  
32  
33 355 Throughout all analyses, contour-enhanced funnel plots will be constructed to visually assess  
34  
35 356 patterns in estimates of effect sizes and precision among studies, to investigate heterogeneity  
36  
37 357 and possible meta-biases.[57-59] The relative amount of heterogeneity will be estimated  
38  
39 358 (e.g., using  $I^2$ ) and forest plots presented. Subgroup or meta-regression analyses may be  
40  
41 359 conducted if pronounced heterogeneity is estimated.[51]  
42  
43  
44

45 360

### 47 361 **Patient and public involvement**

48  
49 362 The level and type of participant/patient and public involvement will pertain to each  
50  
51 363 respective component study used for the meta-analyses, with additional studies to be  
52  
53 364 identified from systematic review. Accordingly, we refer the reader to respective published  
54  
55 365 journal articles for each component study for further details.[60-67]  
56  
57  
58

59 366  
60

## 367 **ETHICS AND DISSEMINATION**

368 Ethics approvals obtained for each of the participating cohorts state that participants have  
369 consented to have their data collected and used for research purposes. Furthermore, there are  
370 no expected harms or risks to participants, as data have already been collected within each  
371 individual cohort, under existing ethics approvals. De-identified data will be collated and  
372 analysed, with no new procedures planned for participants. The AIMS study has been  
373 assessed as exempt from ethics review by the Human Research Ethics Office at the  
374 University of Western Australia (file reference number RA/4/20/5014).

375

## 376 **DISCUSSION**

377 Although several published meta-analyses have investigated associations of endogenous  
378 testosterone with health outcomes in men,[68-79] none have conducted IPD meta-analyses of  
379 health outcomes as planned for this study. A previous IPD meta-analysis focussed on the  
380 outcome of metabolic syndrome.[71] Results from this study will improve upon previously  
381 published estimates from individual studies, in terms of the generalisability of findings.  
382 Estimates from the IPD meta-analyses are also likely to be more reliable than those published  
383 from conventional meta-analyses because they typically have higher statistical power and  
384 provide scope for controlling for important confounders and risk factors.[37, 38] Uncertainty  
385 will undoubtedly remain due to the possibility of confounding influences of unadjusted  
386 effects. However, unlike a randomised controlled trial, this study avoids the need to subject  
387 individuals to interventions, and provides more comprehensive characterisation of temporal  
388 relationships between baseline androgen concentrations and a range of key health  
389 outcomes.[80]

390

1  
2  
3 391 Accordingly, it is hoped that the AIMS collaboration will ultimately complement the research  
4  
5 392 efforts and outputs from multiple prospective cohort studies by drawing upon the collective  
6  
7 393 body of evidence to clarify the role of endogenous sex hormone levels on major health  
8  
9 394 outcomes in men. It is possible that this work might also elucidate new understanding, arising  
10  
11 395 from improved scope for fitting more complex models due to increased statistical power, or  
12  
13 396 from patterns detected in subgroup or meta-regression analyses. Clinically, research outputs  
14  
15 397 will be used to identify the scope and optimal recruitment criteria for future trials of  
16  
17 398 testosterone therapy. These data will also allow reference ranges for testosterone in men  
18  
19 399 across ages and geographical locations to be refined, to inform recommendations for clinical  
20  
21 400 practice more generally.  
22  
23  
24  
25  
26  
27  
28  
29

## 30 402 **CONCLUSION**

31 403 This new collaboration (the AIMS study) and series of IPD-meta analyses described here will  
32  
33 404 complement previous research efforts and outputs from a number of prospective cohort  
34  
35 405 studies for describing associations between endogenous androgen concentrations and health  
36  
37 406 outcomes in men. Research outputs will serve to progress the collective body of knowledge  
38  
39 407 and clarify the importance of testosterone for male health more generally, with several key  
40  
41 408 implications for clinical practice, including prevention (of testosterone decline), personalised  
42  
43 409 medicine and testosterone therapy.  
44  
45  
46  
47  
48

## 49 411 **Acknowledgements**

50  
51 412 We thank Östen Ljunggren of the Department of Medical Sciences, Uppsala University and  
52  
53 413 Liesbeth Vandenput of the Centre for Bone and Arthritis Research at the Sahlgrenska  
54  
55 414 Academy Institute of Medicine, University of Gothenburg, Mary Lou Biggs, Terena  
56  
57 415 Solomons, Jos Tournoy, Mark Divitni, Matthew Knuiman, John Acres, the staff and  
58  
59  
60

1  
2  
3 416 participants of the ARIC study, the Busselton Population Medical Research Foundation for  
4  
5 417 access to the data, the Cardiovascular Health Study, the EMAS study, the Health In Men  
6  
7 418 Study, the MAILES study, the MrOS Study, for their important contributions.  
8  
9

10  
11 419

12  
13 420 **Collaborators**

14  
15 421 The Androgens In Men Study: (1) Busselton Health Study: Busselton Population Medical  
16  
17 422 Research Institute (Inc.), Department of Pulmonary Physiology and Sleep Medicine, Sir  
18  
19 423 Charles Gairdner Hospital, Nedlands WA 6009, Australia (2) Health In Men Study (HIMS):  
20  
21 424 Western Australian Centre for Health and Ageing, University of Western Australia, Level 6  
22  
23 425 Medical Research Foundation Building, Royal Perth Hospital, Rear 50 Murray Street, Perth,  
24  
25 426 Western Australia 6000, Australia. (3) Men Androgen Inflammation Lifestyle Environment  
26  
27 427 and Stress (MAILES) study: Freemasons Foundation Centre for Men's Health, University of  
28  
29 428 Adelaide, 254 North Tce, Adelaide, Australia. (4) European Male Ageing Study (EMAS):  
30  
31 429 The University of Manchester, Stopford Building, Oxford Road, Manchester, M13 9PT, UK.  
32  
33 430 (5) Osteoporotic Fractures in Men (MrOS) Study Sweden: Department of Clinical Sciences  
34  
35 431 and Orthopedic Surgery, Lund University, Skåne University Hospital, Malmö, Sweden;  
36  
37 432 MrOS Study USA: California Pacific Medical Center Research Institute, San Francisco  
38  
39 433 Coordinating Center, 550 16th street, San Francisco, CA 94143. (6) Atherosclerosis Risk in  
40  
41 434 Communities study (ARIC): School of Public Health, U. of North Carolina, Suite 2013,  
42  
43 435 NCNB Plaza, 137 E. Franklin St, Chapel Hill, NC 27514. (7) Cardiovascular Health Study:  
44  
45 436 National Heart, Lung, and Blood Institute, Bethesda, MD. (8) The Framingham Heart Study,  
46  
47 437 Boston University School of Medicine, 72 E. Concord Street, B-601, Boston, MA 02118.  
48  
49  
50  
51  
52  
53  
54 438  
55  
56  
57  
58  
59  
60

1  
2  
3 439 **Authors' contributions**  
4

5 440 BBY, KM, LA, SB, ASD, AMM, CO, EO, TWO, DV, GAW, contributed to the study  
6  
7 441 concept and design. BBY, KM, RJM prepared the initial draft of the manuscript, including  
8  
9 442 literature review, list of variables and statistical methods. All authors were involved in  
10  
11 443 subsequent revisions to the protocol and manuscript, and approved this submission.  
12  
13  
14  
15 444

16  
17 445 **Funding**  
18

19 446 AIMS is funded by a Western Australian Health Translation Network (WAHTN) Medical  
20  
21 447 Research Future Fund Rapid Applied Translation Grant (2018). The ARIC study is funded by  
22  
23 448 has been funded in whole or in part with Federal funds from the National Heart, Lung, and  
24  
25 449 Blood Institute, National Institutes of Health, Department of Health and Human Services,  
26  
27 450 under Contract nos. (HHSN268201700001I, HHSN268201700002I, HHSN268201700003I,  
28  
29 451 HHSN268201700005I, HHSN268201700004I) and Dr. Ballantyne received NIH grant  
30  
31 452 support through R01HL134320 The 1994/1995 Busselton Health Survey was supported by  
32  
33 453 the Western Australian Health Promotion Foundation. The Cardiovascular Health Study was  
34  
35 454 supported by contracts HHSN268201200036C, HHSN268200800007C,  
36  
37 455 HHSN268201800001C, N01HC55222, N01HC85079, N01HC85080, N01HC85081,  
38  
39 456 N01HC85082, N01HC85083, N01HC85086, and grants U01HL080295 and U01HL130114  
40  
41 457 from the National Heart, Lung, and Blood Institute (NHLBI), with additional contribution  
42  
43 458 from the National Institute of Neurological Disorders and Stroke (NINDS). Additional  
44  
45 459 support was provided by R01AG023629 from the National Institute on Aging (NIA). A full  
46  
47 460 list of principal CHS investigators and institutions can be found at CHS-NHLBI.org. The  
48  
49 461 EMAS study is funded by The Commission of the European Communities Fifth Framework  
50  
51 462 Programme "Quality of Life and Management of Living Resources" Grant No. QLK6-CT-  
52  
53 463 2001-00 258 and supported by Arthritis Research UK. The Framingham Heart Study of the  
54  
55  
56  
57  
58  
59  
60



1  
2  
3 464 National Heart Lung and Blood Institute of the National Institutes of Health and Boston  
4  
5 465 University School of Medicine has been funded in whole or in part with Federal funds from  
6  
7 466 the National Heart, Lung, and Blood Institute, National Institutes of Health, Department of  
8  
9 467 Health and Human Services, under Contract No. 75N92019D00031. The HIMS study is  
10  
11 468 funded by project grants from the National Health and Medical Research Council of  
12  
13 469 Australia. The MAILES study is funded by a project grant from the National Health and  
14  
15 470 Medical Research Council of Australia (627227). The MrOS Sweden study is funded by The  
16  
17 471 Swedish Research Council and Swedish ALF funding. The Osteoporotic Fractures in Men  
18  
19 472 (MrOS) Study is supported by National Institutes of Health funding. The following institutes  
20  
21 473 provide support: the National Institute on Aging (NIA), the National Institute of Arthritis and  
22  
23 474 Musculoskeletal and Skin Diseases (NIAMS), the National Center for Advancing  
24  
25 475 Translational Sciences (NCATS), and NIH Roadmap for Medical Research under the  
26  
27 476 following grant numbers: U01 AG027810, U01 AG042124, U01 AG042139, U01  
28  
29 477 AG042140, U01 AG042143, U01 AG042145, U01 AG042168, U01 AR066160, and UL1  
30  
31 478 TR000128.  
32  
33  
34  
35  
36  
37  
38  
39  
40

41  
42  
43  
44  
45  
46  
47  
48  
49  
50  
51  
52  
53  
54  
55  
56  
57  
58  
59  
60

480 **Disclaimer**

481 The funders played no role in the study design, data collection, data analysis or interpretation,  
482 writing of the manuscript or the decision to submit the article for publication. All authors are  
483 accountable for all aspects of the work in ensuring that questions related to the accuracy or  
484 integrity of any part of the work are appropriately investigated and resolved. The content is  
485 solely the responsibility of the authors and does not necessarily represent the official views of  
486 the National Institutes of Health.

487  
488 **Competing interests**

489 None declared.

1  
2  
3 490  
4

5 491 **Patient consent**

6  
7  
8 492 Each of the component studies have addressed participant/patient consent permissions; please  
9  
10 493 refer to respective component studies for details.[60-67]  
11

12 494  
13

14  
15 495 **Ethics approval**

16  
17 496 The AIMS study has been assessed as exempt from ethics review by the Human Ethics office  
18  
19 497 at the University of Western Australia (file reference number RA/4/20/5014). Each of the  
20  
21 498 component studies had obtained ethics approvals; please refer to respective component  
22  
23 499 studies for details.[60-67]  
24  
25

26 500  
27

28 501 **Provenance and peer review**

29  
30 502 Not commissioned; externally peer reviewed.  
31  
32

33 503  
34

35 504  
36  
37  
38  
39  
40  
41  
42  
43  
44  
45  
46  
47  
48  
49  
50  
51  
52  
53  
54  
55  
56  
57  
58  
59  
60

505 **References cited**

- 506 1. Handelsman DJ, Yeap BB, Flicker L, et al. Age-specific population centiles for androgen status in  
507 men. *Eur J Endocrinol* 2015;173(6):809-17. doi: 10.1530/EJE-15-0380
- 508 2. Hsu B, Cumming RG, Hirani V, et al. Temporal trend in androgen status and androgen-sensitive  
509 outcomes in older men. *J Clin Endocrinol Metab* 2016;101(4):1836-46. doi: 10.1210/jc.2015-3810
- 510 3. Shi Z, Araujo AB, Martin S, et al. Longitudinal changes in testosterone over five years in  
511 community-dwelling men. *J Clin Endocrinol Metab* 2013;98(8):3289-97. doi: 10.1210/jc.2012-  
512 3842
- 513 4. Yeap BB, Manning L, Chubb SAP, et al. Progressive impairment of testicular endocrine function in  
514 ageing men: testosterone and dihydrotestosterone decrease, and luteinizing hormone increases,  
515 in men transitioning from the 8th to 9th decades of life. *Clin Endocrinol* 2018;88:88-95. doi:  
516 10.1111/cen.13484
- 517 5. Sikaris K, McLachlan RI, Kazlauskas R, et al. Reproductive hormone reference intervals for healthy  
518 fertile young men: evaluation of automated platform assays. *J Clin Endocrinol Metab*  
519 2005;90(11):5928-36. doi: 10.1210/jc.2005-0962
- 520 6. Yeap BB, Alfonso H, Chubb SAP, et al. Reference ranges and determinants of testosterone,  
521 dihydrotestosterone, and estradiol levels measured using liquid chromatography-tandem mass  
522 spectrometry in a population-based cohort of older men. *J Clin Endocrinol Metab*  
523 2012;97(11):4030-39. doi: 10.1210/jc.2012-2265
- 524 7. Handelsman DJ, Wartofsky L. Requirement for Mass Spectrometry Sex Steroid Assays in the  
525 Journal of Clinical Endocrinology and Metabolism. *J Clin Endocrinol Metab* 2013;98:3971-73. doi:  
526 10.1210/jc.2013-3375
- 527 8. Hsu B, Cumming RG, Naganathan V, et al. Temporal Changes in Androgens and Estrogens Are  
528 Associated With All-Cause and Cause-Specific Mortality in Older Men. *J Clin Endocrinol Metab*  
529 2016;101:2201-10. doi: 10.1210/jc.2016-1025
- 530 9. Ohlsson C, Barrett-Connor E, Bhasin S, et al. High Serum Testosterone Is Associated With Reduced  
531 Risk of Cardiovascular Events in Elderly Men. *J Am Coll Cardiol* 2011;58:1674-81. doi:  
532 10.1016/j.jacc.2011.07.019
- 533 10. Pye SR, Huhtaniemi IT, Finn JD, et al. Late-Onset Hypogonadism and Mortality in Aging Men. *J*  
534 *Clin Endocrinol Metab* 2014;99:1357-66. doi: 10.1210/jc.2013-2052
- 535 11. Tivesten A, Mellstrom D, Jutberger H, et al. Low serum testosterone and high serum estradiol  
536 associate with lower extremity peripheral arterial disease in elderly men. *J Am Coll Cardiol*  
537 2007;50:1070-76. doi: 10.1016/j.jacc.2007.04.088
- 538 12. Tivesten A, Vandenput L, Labrie F, et al. Low serum testosterone and estradiol predict mortality  
539 in elderly men. *J Clin Endocrinol Metab* 2009;94:2482-88. doi: 10.1210/jc.2008-2650
- 540 13. Yeap BB, Alfonso H, Chubb SAP, et al. In older men, higher plasma testosterone or  
541 dihydrotestosterone is an independent predictor for reduced incidence of stroke but not  
542 myocardial infarction. *J Clin Endocrinol Metab* 2014;99(12):4565-73. doi: 10.1210/jc.2014-2664
- 543 14. Yeap BB, Hyde Z, Almeida OP, et al. Lower testosterone levels predict incident stroke and  
544 transient ischemic attack in older men. *J Clin Endocrinol Metab* 2009;94(7):2353-59. doi:  
545 10.1210/jc.2008-2416
- 546 15. Yeap BB, Knuiman MW, Divitni ML, et al. Differential associations of testosterone,  
547 dihydrotestosterone and oestradiol with physical, metabolic and health-related factors in  
548 community-dwelling men aged 17–97 years from the Busselton Health Survey. *Clin Endocrinol*  
549 2014;81:100-08.
- 550 16. Chan YX, Knuiman MW, Hung J, et al. Neutral associations of testosterone, dihydrotestosterone  
551 and estradiol with fatal and non-fatal cardiovascular events, and mortality in men aged 17–97  
552 years. *Clin Endocrinol* 2016;85:575-82. doi: 10.1111/cen.13089

- 1  
2  
3 553 17. Shores MM, Arnold AM, Biggs ML, et al. Testosterone and dihydrotestosterone and incident  
4 554 ischaemic stroke in men in the Cardiovascular Health Study. *Clin Endocrinol* 2014;81:746-53. doi:  
5 555 10.1111/cen.12452  
6 556 18. Shores MM, Biggs ML, Arnold AM, et al. Testosterone, Dihydrotestosterone, and Incident  
7 557 Cardiovascular Disease and Mortality in the Cardiovascular Health Study. *J Clin Endocrinol Metab*  
8 558 2014;99:2061-68. doi: 10.1210/jc.2013-3576  
9 559 19. Srinath R, Golden SH, Carson KA, et al. Endogenous Testosterone and its Relationship to  
10 560 Preclinical and Clinical Measures of Cardiovascular Disease in the Atherosclerosis Risk in  
11 561 Communities Study. *J Clin Endocrinol Metab* 2015;100:1602-08. doi: 10.1210/jc.2014-3934  
12 562 20. Srinath R, Gottesman RF, Golden SH, et al. Association Between Endogenous Testosterone and  
13 563 Cerebrovascular Disease in the ARIC Study (Atherosclerosis Risk in Communities). *Stroke*  
14 564 2016;47:2682-88. doi: 10.1161/STROKEAHA.116.014088  
15 565 21. Chan YX, Knuiman MW, Divitni ML, et al. Lower circulating androgens are associated with overall  
16 566 cancer risk and prostate cancer risk in men aged 25-84 years from the Busselton Health Study.  
17 567 *Horm Cancer* 2018;9:391-98. doi: 10.1007/s12672-018-0346-5  
18 568 22. Daniels NA, Nielson CM, Hoffman AR, et al. Sex hormones and the risk of incident prostate  
19 569 cancer. *Urology* 2010;76:1034-14. doi: 10.1016/j.urology.2010.01.086  
20 570 23. Ford AH, Yeap BB, Flicker L, et al. Sex hormones and incident dementia in older men: The health  
21 571 in men study. *Psychoneuroendocrinol* 2018;98:139-47. doi: 10.1016/j.psyneuen.2018.08.013  
22 572 24. Ford AH, Yeap BB, Flicker L, et al. Prospective longitudinal study of testosterone and incident  
23 573 depression in older men: The Health In Men Study. *Psychoneuroendocrinology* 2016;64:57-65.  
24 574 doi: 10.1016/j.psyneuen.2015.11.012  
25 575 25. LeBlanc ES, Wang PY, Janowsky JS, et al. Association between sex steroids and cognition in  
26 576 elderly men. *Clin Endocrinol* 2010;72:393-403. doi: 10.1111/j.1365-2265.2009.03692.x  
27 577 26. Yeap BB, Wu FCW. Clinical practice update on testosterone therapy for male hypogonadism:  
28 578 contrasting perspectives to optimize care. *Clin Endocrinol* 2019;90:56-65. doi: 10.1111/cen.13888  
29 579 27. Yeap BB, Grossmann M, McLachlan RI, et al. Endocrine Society of Australia position statement on  
30 580 male hypogonadism (part 2): treatment and therapeutic considerations. *Med J Aust*  
31 581 2016;205:228-31. doi: 10.5694/mja16.00448  
32 582 28. Yeap BB, Grossmann M, McLachlan RI, et al. Endocrine Society of Australia position statement on  
33 583 male hypogonadism (part 1): assessment and indications for testosterone therapy. *Med J Aust*  
34 584 2016;205:173-78. doi: 10.5694/mja16.00393  
35 585 29. Bhasin S, Brito JP, Cunningham GR, et al. Testosterone therapy in men with hypogonadism: an  
36 586 Endocrine Society\* Clinical Practice Guideline. *J Clin Endocrinol Metab* 2018;103(5):1715-44. doi:  
37 587 10.1210/jc.2018-00229  
38 588 30. Resnick SM, Matsumoto AM, Stephens-Shields AJ, et al. Testosterone treatment and cognitive  
39 589 function in older men with low testosterone and age-associated memory impairment. *JAMA*  
40 590 2017;317:717-27. doi: 10.1001/jama.2016.21044  
41 591 31. Roy CN, Snyder PJ, Stephens-Shields AJ, et al. Association of testosterone levels with anemia in  
42 592 older men: A controlled clinical trial. *JAMA Intern Med* 2017;177:480-90. doi:  
43 593 10.1001/jamainternmed.2016.9540  
44 594 32. Snyder PJ, Bhasin S, Cunningham GR, et al. Effects of testosterone treatment in older men. *N*  
45 595 *Engl J Med* 2016;374:611-24. doi: 10.1056/NEJMoa1506119  
46 596 33. Snyder PJ, Bhasin S, Cunningham GR, et al. Lessons from the testosterone trials. *Endocr Rev*  
47 597 2018;39:369-86. doi: 10.1210/er.2017-00234  
48 598 34. Snyder PJ, Kopperdahl DL, Stephens-Shields AJ, et al. Effect of testosterone treatment on  
49 599 volumetric bone density and strength in older men with low testosterone: A controlled clinical  
50 600 trial. *JAMA Intern Med* 2017;177:471-79. doi: 10.1001/jamainternmed.2016.9539  
51 601 35. Budoff M, Ellenberg SS, Lewis CE, et al. Testosterone treatment and coronary artery plaque  
52 602 volume in older men with low testosterone. *JAMA* 2017;317:708-16. doi:  
53 603 10.1001/jama.2016.21043

- 1  
2  
3 604 36. Yeap BB, Page ST, Grossmann M. Testosterone treatment in older men: clinical implications and  
4 605 unresolved questions from the Testosterone Trials. *Lancet Diabetes Endocrinol* 2018;6:659-72.  
5 606 doi: 10.1016/S2213-8587(17)30416-3  
6 607  
7 607 37. Riley RD, Lambert PC, Abo-Zaid G. Meta-analysis of individual participant data: rationale,  
8 608 conduct, and reporting. *BMJ* 2010; 340.  
9 609  
10 610 38. Stewart LA, Parmar MKB. Meta-analysis of the literature or of individual patient data: is there a  
11 611 difference? *Lancet* 1993;341:418-22.  
12 612  
13 612 39. Burke DL, Ensor J, Riley RD. Meta-analysis using individual participant data: one-stage and two-  
14 613 stage approaches, and why they may differ. *Statist Med* 2016;36:855-75. doi: 10.1002/sim.7141  
15 614  
16 614 40. Debray TP, Moons KG, Abo-Zaid GM, et al. Individual participant data meta-analysis for a binary  
17 615 outcome: one-stage or two-stage? *PloS One* 2013; 8.  
18 616  
19 616 41. Munn Z, Stern C, Aromataris E, et al. What kind of systematic review should I conduct? A  
20 617 proposed typology and guidance for systematic reviewers in the medical and health sciences.  
21 618 *BMC Med Res Methodol* 2018; 18.  
22 618  
23 618 42. Stewart LA, Clarke M, Rovers M, et al. Preferred reporting items for a systematic review and  
24 619 meta-analysis of individual participant data: the PRISMA-IPD statement. *JAMA*  
25 620 2015;313(16):1657-65. doi: 10.1001/jama.2015.3656  
26 621  
27 621 43. Stroup DF, Berlin JA, Morton SC, et al. Meta-analysis of observational studies in epidemiology.  
28 622 *JAMA* 2000;283:2008-12.  
29 623  
30 623 44. Higgins JPT, Altman DG, Sterne JAC. Chapter 8: Assessing risk of bias in included studies In:  
31 624 Higgins JPT, Altman DG, Sterne JAC, eds. *Cochrane Handbook for Systematic Reviews of*  
32 625 *Interventions* version 520. [www.training.cochrane.org/handbook](http://www.training.cochrane.org/handbook): The Cochrane Collaboration,  
33 626 2017.  
34 627  
35 627 45. Liberati A, Altman DG, Tetzlaff J, et al. The PRISMA statement for reporting systematic reviews  
36 628 and meta-analyses of studies that evaluate health care interventions: explanation and  
37 629 elaboration. *PLOS Med* 2009; 6(7).  
38 630  
39 630 46. Deeks JJ, Higgins JPT, Altman DG. Chapter 9: Analysing data and undertaking meta-analyses. In:  
40 631 Higgins JPT, Churchill R, Chandler J, et al., eds. *Cochrane Handbook for Systematic Reviews of*  
41 632 *Interventions* version 520. [www.training.cochrane.org/handbook](http://www.training.cochrane.org/handbook): The Cochrane Collaboration,  
42 633 2017.  
43 634  
44 634 47. Hukkelhoven CWPM, Steyerberg EW, Rampen AJJ, et al. Patient age and outcome following  
45 635 severe traumatic brain injury: an analysis of 5600 patients. *J Neurosurg* 2003;99:666-73.  
46 636  
47 636 48. Riley RD, Simmonds MC, Look MP. Evidence synthesis combining individual patient data and  
48 637 aggregate data: a systematic review identified current practice and possible methods. *J Clin*  
49 638 *Epidemiol* 2007;60:431-39. doi: 10.1016/j.jclinepi.2006.09.009  
50 639  
51 639 49. Steyerberg EW, Kievit J, de Mol Van Otterloo JC. Perioperative mortality of elective abdominal  
52 640 aortic aneurysm surgery. A clinical prediction rule based on literature and individual patient data.  
53 641 *Arch Intern Med* 1995;155:1998-2004.  
54 642  
55 642 50. Ly LP, Sartorius G, Hull L, et al. Accuracy of calculated free testosterone formulae in men. *Clin*  
56 643 *Endocrinol* 2010;73:382-88. doi: 10.1111/j.1365-2265.2010.03804.x  
57 644  
58 644 51. Borenstein M, Hedges LV, Higgins JPT, et al. *Introduction to Meta-Analysis*. West Sussex: John  
59 645 Wiley & Sons Ltd 2009.  
60 646  
61 646 52. Fisher R. *Statistical methods for research workers* (2nd ed.). New York: Hafner 1928.  
62 647  
63 647 53. Pearson K. On a correction needful in the case of the correlation ratio. *Biometrika* 1911;8:254-56.  
64 648  
65 648 54. Keiding N, Anderson PK, Klein JP. The role of frailty models and accelerated failure time models  
66 649 in describing heterogeneity due to omitted covariates. *Statist Med* 1997;16:215-24.  
67 650  
68 650 55. Vaupel JW, Manton KG, Stallard E. The impact of heterogeneity in individual frailty on the  
69 651 dynamics of mortality. *Demography* 1979;16:439-54.  
70 652  
71 652 56. Yashin A, Vaupel J, Iachine I. Correlated individual frailty: An advantageous approach to survival  
72 653 analysis of bivariate data. *Math Popul Stud* 1995;5:145-59.

- 1  
2  
3 654 57. Ahmed I, Sutton AJ, Riley RD. Assessment of publication bias, selection bias, and unavailable data  
4 655 in meta-analyses using individual participant data: a database survey. *BMJ* 2012; 344.  
5 656 58. Shamseer L, Moher D, Clarke M, et al. Preferred reporting items for systematic review and meta-  
6 657 analysis protocols (PRISMA-P) 2015: elaboration and explanation. *BMJ* 2015; 350.  
7 658 59. Sterne JAC, Sutton AJ, Ioannidis JPA, et al. Recommendations for examining an interpreting  
8 659 funnel plot asymmetry in meta-analyses of randomised controlled trials. *BMJ* 2011; 342.  
9 660 60. Fried LP, Borhani NO, Enright P, et al. The Cardiovascular Health Study: Design and Rationale.  
10 661 *Ann Epidemiol* 1991;1:263-76.  
11 662 61. Grant JF, Martin SA, Taylor AW, et al. Cohort Profile: The Men Androgen Inflammation Lifestyle  
12 663 Environment and Stress (MAILES) Study. *Int J Epidemiol* 2014;43:1040-53. doi: 10.1093/ije/dyt064  
13 664 62. Kannel WB, Feinleib M, McNamara PM, et al. An investigation of coronary heart disease in  
14 665 families: The Framingham Offspring Study. *Am J Epidemiol* 1979;110:281-90.  
15 666 63. Knuiman MW, Jamrozik K, Welborn TA, et al. Age and secular trends in risk factors for  
16 667 cardiovascular disease in Busselton. *Aust J Public Health* 1995;19:375-82.  
17 668 64. Lee DM, O'Neill TW, Pye SR, et al. The European Male Ageing Study (EMAS): design, methods and  
18 669 recruitment. *Int J Androl* 2008;32:11-24. doi: 10.1111/j.1365-2605.2008.00879.x  
19 670 65. Norman PE, Flicker L, Almeida OP, et al. Cohort Profile: The Health In Men Study (HIMS). *Int J*  
20 671 *Epidemiol* 2009;38:48-52. doi: 10.1093/ije/dyn041  
21 672 66. Orwoll E, Blank JB, Barrett-Connor E, et al. Design and baseline characteristics of the  
22 673 osteoporotic fractures in men (MrOS) study — A large observational study of the determinants of  
23 674 fracture in older men. *Contemp Clin Trials* 2005;26:569-85. doi: 10.1016/j.cct.2005.05.006  
24 675 67. The ARIC Investigators. The Atherosclerosis Risk In Communities (ARIC) study: design and  
25 676 objectives. *Am J Epidemiol* 1989;129:687-702.  
26 677 68. Araujo AB, Dixon JM, Suarez EA, et al. Endogenous Testosterone and Mortality in Men: A  
27 678 Systematic Review and Meta-Analysis. *J Clin Endocrinol Metab* 2011;96:3007-19. doi:  
28 679 10.1210/jc.2011-1137  
29 680 69. Atlantis E, Fahey P, Cochrane B, et al. Endogenous testosterone level and testosterone  
30 681 supplementation therapy in chronic obstructive pulmonary disease (COPD): a systematic review  
31 682 and meta-analysis. *BMJ Open* 2013; 3.  
32 683 70. Boyle P, Koehlin A, Bota M, et al. Endogenous and exogenous testosterone and the risk of  
33 684 prostate cancer and increased prostatespecific antigen (PSA) level: a meta-analysis. *BJU Int*  
34 685 2016;118:731-41. doi: 10.1111/bju.13417  
35 686 71. Brand JS, Rovers MM, Yeap BB, et al. Testosterone, Sex Hormone-Binding Globulin and the  
36 687 Metabolic Syndrome in Men: An Individual Participant Data Meta-Analysis of Observational  
37 688 Studies. *PLoS One* 2014; 9.  
38 689 72. Brand JS, van der Tweel I, Grobbee DE, et al. Testosterone, sex hormone-binding globulin and the  
39 690 metabolic syndrome: a systematic review and meta-analysis of observational studies. *Int J*  
40 691 *Epidemiol* 2010;40:189-207. doi: 10.1093/ije/dyq158  
41 692 73. Claps M, Petrelli F, Caffo O, et al. Testosterone Levels and Prostate Cancer Prognosis: Systematic  
42 693 Review and Meta-analysis. *Clin Genitourin Cancer* 2018;16:165-75. doi:  
43 694 10.1016/j.clgc.2018.01.005  
44 695 74. Corona G, Monami M, Rastrelli G, et al. Testosterone and Metabolic Syndrome: A Meta-Analysis  
45 696 Study. *J Sex Med* 2011;8:272-83. doi: 10.1111/j.1743-6109.2010.01991.x  
46 697 75. Haddad RM, Kennedy CC, Caples SM, et al. Testosterone and cardiovascular risk in men: A  
47 698 systematic review and meta-analysis of randomised placebo-controlled trials. *Mayo Clin Proc*  
48 699 2007;82:29-39.  
49 700 76. Holmegard HN, Nordestgaard BG, Jensen GB, et al. Sex hormones and ischemic stroke: a  
50 701 prospective cohort study and meta-analyses. *J Clin Endocrinol Metab* 2016;101:69-78. doi:  
51 702 10.1210/jc.2015-2687  
52  
53  
54  
55  
56  
57  
58  
59  
60

- 1  
2  
3 703 77. Isidori AM, Giannetta E, Gianfrilli D, et al. Effects of testosterone on sexual function in men:  
4 704 results of a meta-analysis. *Clin Endocrinol* 2005;63:381-94. doi: 10.1111/j.1365-  
5 705 2265.2005.02350.x  
6 706 78. Lv W, Du N, Liu Y, et al. Low Testosterone Level and Risk of Alzheimer's Disease in the Elderly  
7 707 Men: a Systematic Review and Meta-Analysis. *Mol Neurobiol* 2016;53:2679-84. doi:  
8 708 10.1007/s12035-015-9315-y  
9 709 79. Ruige JB, Mahmoud AM, Bacquer DD, et al. Endogenous testosterone and cardiovascular disease  
10 710 in healthy men: a meta-analysis. *Heart* 2010;97:870-75. doi: 10.1136/hrt.2010.210757  
11 711 80. Gordis L. *Epidemiology*. 4th ed. Philadelphia: Saunders 2009.

12  
13  
14 712  
15  
16  
17  
18  
19  
20  
21  
22  
23  
24  
25  
26  
27  
28  
29  
30  
31  
32  
33  
34  
35  
36  
37  
38  
39  
40  
41  
42  
43  
44  
45  
46  
47  
48  
49  
50  
51  
52  
53  
54  
55  
56  
57  
58  
59  
60

For peer review only

## 713 TABLES

714 Table 1. Variables planned to be included in IPD meta-analysis modelling.¶¶

| Type                                  | Analysis 1                 | Analysis 2                            | Analysis 3                   | Analysis 4              |
|---------------------------------------|----------------------------|---------------------------------------|------------------------------|-------------------------|
| <b>Outcomes / DV</b>                  | Androgen concentration§    | Incident CVD*                         | Incident deaths (cancer*)    | Incident dementia       |
|                                       |                            | Incident deaths (CVD*)                | Incident cancer* (diagnoses) | Baseline cognition      |
|                                       |                            | Incident deaths (all-cause)           |                              | Change in cognition     |
| <b>Focal predictor</b>                | -                          | Androgen concentration§               | Androgen concentration§      | Androgen concentration§ |
| <b>Covariates / IV</b>                |                            |                                       |                              |                         |
| <b>Demographic</b>                    | age                        | age                                   | age                          | age                     |
|                                       | education level            | education level                       | education level              | education level         |
|                                       | ethnicity                  | ethnicity                             | ethnicity                    | ethnicity               |
|                                       | marital status             | marital status                        | marital status               | marital status          |
|                                       | site                       | site                                  | site                         | site                    |
| <b>Risk factors and comorbidities</b> | alcohol consumption        | alcohol consumption                   | alcohol consumption          | alcohol consumption     |
|                                       | BMI, waist                 | BMI, waist                            | BMI, waist                   | BMI, waist              |
|                                       | physical activity          | physical activity                     | physical activity            | physical activity       |
|                                       | smoking status             | smoking status                        | smoking status               | smoking status          |
|                                       | BP, hypertension           | BP, hypertension                      | BP, hypertension             | BP, hypertension        |
|                                       | general health             | general health<br>atrial fibrillation | general health               | general health          |
|                                       | prevalent CVD              | prevalent CVD                         |                              |                         |
|                                       | prevalent cancer*          |                                       | prevalent cancer*            |                         |
|                                       | prevalent dementia         |                                       |                              | prevalent dementia      |
|                                       | baseline cognition         |                                       |                              |                         |
|                                       | COPD                       | COPD                                  |                              |                         |
|                                       | diabetes                   | diabetes                              | diabetes                     | diabetes                |
|                                       | cholesterol, LDL, HDL      | cholesterol, LDL, HDL                 |                              |                         |
|                                       | creatinine level           | creatinine level                      |                              |                         |
|                                       | lipid lowering medications | lipid lowering medications            |                              |                         |
|                                       | anxiety                    |                                       |                              | anxiety                 |
|                                       | depression                 |                                       |                              | depression              |
|                                       | psychotropic drug use      |                                       |                              | psychotropic drug use   |

715 **Abbreviations:** BMI = body mass index; BP= blood pressure; CVD = Cardiovascular  
716 Disease; DV = dependent variable; COPD = Chronic Obstructive Pulmonary Disease;  
717 IV = independent variables.

718 ¶¶ = Black font: highly desirable; Green font: only if available.



1  
2  
3  
4  
5  
6  
7  
8  
9  
10  
11  
12  
13  
14  
15  
16  
17  
18  
19  
20  
21  
22  
23  
24  
25  
26  
27  
28  
29  
30  
31  
32  
33  
34  
35  
36  
37  
38  
39  
40  
41  
42  
43  
44  
45  
46  
47  
48  
49  
50  
51  
52  
53  
54  
55  
56  
57  
58  
59  
60

719 § = Androgens: total testosterone, dihydrotestosterone, estradiol, luteinising hormone, sex  
720 hormone binding globulin.  
721 \* = Subgroup analyses are also planned. For CVD outcomes: Heart Failure, Myocardial  
722 Infarction, Stroke. For cancer outcomes: colorectal cancer, lung cancer, prostate  
723 cancer.

For peer review only

**Supplementary Table S1.** Example search strategy for systematic review: AIMS study.

The following is an example of a preliminary search conducted in MEDLINE.

1. Testosterone/ or Androgens/
2. (testosterone or androgen\* or sex hormone\* or sex steroid\*).ti.
3. (testosterone or androgen\*).ab.
4. cardiovascular diseases/ or heart diseases/ or heart failure/ or vascular diseases/ or stroke/ or myocardial infarction/ or coronary disease/ or cerebrovascular disorders/
5. (cardiovascular or stroke or myocardial infarction or heart failure).ti.
6. neoplasms/ or colorectal neoplasms/ or lung neoplasms/ or prostatic neoplasms/
7. cancer.ti.
8. mortality/ or mortality.ti.
9. dementia/ or cognition/ or dementia.ti. or cognit\*.ti.
10. Aging/psychology or Neuropsychological Tests/
11. 1 or 2 or 3
12. 4 or 5 or 6 or 7 or 8 or 9 or 10
13. 11 and 12
14. longitudinal studies/ or prospective studies/ or follow-up studies/ or cohort studies/
15. (prospective or follow-up or cohort study or longitudinal study).ti,ab.
16. 14 or 15
17. 13 and 16
18. (exogenous or replacement or therapy or hormone treatment).ti.
19. Hormone Replacement Therapy/
20. 18 or 19
21. 17 not 20
22. limit 21 to humans
23. limit 22 to english language
24. limit 23 to (adaptive clinical trial or address or autobiography or bibliography or biography or case reports or clinical trial, all or clinical trial, phase i or clinical trial, phase ii or clinical trial, phase iii or clinical trial, phase iv or clinical trial, veterinary or clinical trials, veterinary as topic or clinical trial protocol or clinical trial or comment or controlled clinical trial or dictionary or editorial or lecture or legislation or meta analysis or practice guideline or pragmatic clinical trial or published erratum or randomized controlled trial or retracted publication or "retraction of publication" or "review" or "scientific integrity review" or "systematic review")
25. Retrospective Studies/ or Case-Control Studies/ or (retrospective analysis or case-control).ti.
26. 24 or 25
27. 23 not 26

Notes:

Terms with a trailing “/” are MeSH terms and those with a trailing “\*” are truncated search strings. This search strategy has been submitted for registration on PROSPERO [Systematic Review Protocol ID 139668, submitted on 23 July 2019 and is presently being assessed]. Beforehand, a search of PROSPERO was conducted for another suitable strategy but none

1  
2  
3 were found. However, the above strategy is based upon one that has been used for a similar  
4 study.<sup>1</sup>  
5

### 6 **References cited**

7  
8  
9 1. Holmegard HN, Nordestgaard BG, Jensen GB, Tybjaerg-Hansen A, Benn M. Sex  
10 hormones and ischemic stroke: a prospective cohort study and meta-analyses. J Clin  
11 Endocrinol Metab. 2016;101:69-78.  
12  
13  
14  
15  
16  
17  
18  
19  
20  
21  
22  
23  
24  
25  
26  
27  
28  
29  
30  
31  
32  
33  
34  
35  
36  
37  
38  
39  
40  
41  
42  
43  
44  
45  
46  
47  
48  
49  
50  
51  
52  
53  
54  
55  
56  
57  
58  
59  
60

For peer review only

**PRISMA-IPD Checklist of items to include when reporting a systematic review and meta-analysis of individual participant data (IPD):  
the Androgens In Men Study (AIMS).**

| PRISMA-IPD Section/topic  | Item No | Checklist item                                                                                                                                                                                                                                                                                                                                                                                                                                                                                                          | Reported on page |
|---------------------------|---------|-------------------------------------------------------------------------------------------------------------------------------------------------------------------------------------------------------------------------------------------------------------------------------------------------------------------------------------------------------------------------------------------------------------------------------------------------------------------------------------------------------------------------|------------------|
| <b>Title</b>              |         |                                                                                                                                                                                                                                                                                                                                                                                                                                                                                                                         |                  |
| Title                     | 1       | Identify the report as a systematic review and meta-analysis of individual participant data.                                                                                                                                                                                                                                                                                                                                                                                                                            | 1                |
| <b>Abstract</b>           |         |                                                                                                                                                                                                                                                                                                                                                                                                                                                                                                                         |                  |
| Structured summary        | 2       | Provide a structured summary including as applicable:                                                                                                                                                                                                                                                                                                                                                                                                                                                                   | 4-5              |
|                           |         | <b>Background:</b> state research question and main objectives, with information on participants, interventions, comparators and outcomes.                                                                                                                                                                                                                                                                                                                                                                              |                  |
|                           |         | <b>Methods:</b> report eligibility criteria; data sources including dates of last bibliographic search or elicitation, noting that IPD were sought; methods of assessing risk of bias.                                                                                                                                                                                                                                                                                                                                  |                  |
|                           |         | <b>Results:</b> provide number and type of studies and participants identified and number (%) obtained; summary effect estimates for main outcomes (benefits and harms) with confidence intervals and measures of statistical heterogeneity. Describe the direction and size of summary effects in terms meaningful to those who would put findings into practice.                                                                                                                                                      |                  |
|                           |         | <b>Discussion:</b> state main strengths and limitations of the evidence, general interpretation of the results and any important implications.                                                                                                                                                                                                                                                                                                                                                                          |                  |
|                           |         | <b>Other:</b> report primary funding source, registration number and registry name for the systematic review and IPD meta-analysis.                                                                                                                                                                                                                                                                                                                                                                                     |                  |
| <b>Introduction</b>       |         |                                                                                                                                                                                                                                                                                                                                                                                                                                                                                                                         |                  |
| Rationale                 | 3       | Describe the rationale for the review in the context of what is already known.                                                                                                                                                                                                                                                                                                                                                                                                                                          | 6-7              |
| Objectives                | 4       | Provide an explicit statement of the questions being addressed with reference, as applicable, to participants, interventions, comparisons, outcomes and study design (PICOS). Include any hypotheses that relate to particular types of participant-level subgroups.                                                                                                                                                                                                                                                    | 8                |
| <b>Methods</b>            |         |                                                                                                                                                                                                                                                                                                                                                                                                                                                                                                                         |                  |
| Protocol and registration | 5       | Indicate if a protocol exists and where it can be accessed. If available, provide registration information including registration number and registry name. Provide publication details, if applicable.                                                                                                                                                                                                                                                                                                                 | 5,9              |
| Eligibility criteria      | 6       | Specify inclusion and exclusion criteria including those relating to participants, interventions, comparisons, outcomes, study design and characteristics (e.g. years when conducted, required minimum follow-up). Note whether these were applied at the study or individual level i.e. whether eligible participants were included (and ineligible participants excluded) from a study that included a wider population than specified by the review inclusion criteria. The rationale for criteria should be stated. | 8-9              |

| PRISMA-IPD Section/topic                       | Item No | Checklist item                                                                                                                                                                                                                                                                                                                                                                                                                                                                                                                                                                                         | Reported on page |
|------------------------------------------------|---------|--------------------------------------------------------------------------------------------------------------------------------------------------------------------------------------------------------------------------------------------------------------------------------------------------------------------------------------------------------------------------------------------------------------------------------------------------------------------------------------------------------------------------------------------------------------------------------------------------------|------------------|
| <b>Title</b>                                   |         |                                                                                                                                                                                                                                                                                                                                                                                                                                                                                                                                                                                                        |                  |
| Identifying studies - information sources      | 7       | Describe all methods of identifying published and unpublished studies including, as applicable: which bibliographic databases were searched with dates of coverage; details of any hand searching including of conference proceedings; use of study registers and agency or company databases; contact with the original research team and experts in the field; open adverts and surveys. Give the date of last search or elicitation.                                                                                                                                                                | 9                |
| Identifying studies - search                   | 8       | Present the full electronic search strategy for at least one database, including any limits used, such that it could be repeated.                                                                                                                                                                                                                                                                                                                                                                                                                                                                      | 9, Suppl. Data   |
| Study selection processes                      | 9       | State the process for determining which studies were eligible for inclusion.                                                                                                                                                                                                                                                                                                                                                                                                                                                                                                                           | 9                |
| Data collection processes                      | 10      | Describe how IPD were requested, collected and managed, including any processes for querying and confirming data with investigators. If IPD were not sought from any eligible study, the reason for this should be stated (for each such study).<br>If applicable, describe how any studies for which IPD were not available were dealt with. This should include whether, how and what aggregate data were sought or extracted from study reports and publications (such as extracting data independently in duplicate) and any processes for obtaining and confirming these data with investigators. | 10-11            |
| Data items                                     | 11      | Describe how the information and variables to be collected were chosen. List and define all study level and participant level data that were sought, including baseline and follow-up information. If applicable, describe methods of standardising or translating variables within the IPD datasets to ensure common scales or measurements across studies.                                                                                                                                                                                                                                           | 10-11            |
| IPD integrity                                  | A1      | Describe what aspects of IPD were subject to data checking (such as sequence generation, data consistency and completeness, baseline imbalance) and how this was done.                                                                                                                                                                                                                                                                                                                                                                                                                                 | 10-11            |
| Risk of bias assessment in individual studies. | 12      | Describe methods used to assess risk of bias in the individual studies and whether this was applied separately for each outcome. If applicable, describe how findings of IPD checking were used to inform the assessment. Report if and how risk of bias assessment was used in any data synthesis.                                                                                                                                                                                                                                                                                                    | 10-11            |
| Specification of outcomes and effect measures  | 13      | State all treatment comparisons of interests. State all outcomes addressed and define them in detail. State whether they were pre-specified for the review and, if applicable, whether they were primary/main or secondary/additional outcomes. Give the principal measures of effect (such as risk ratio, hazard ratio, difference in means) used for each outcome.                                                                                                                                                                                                                                   | 12-16            |
| Synthesis methods                              | 14      | Describe the meta-analysis methods used to synthesise IPD. Specify any statistical methods and models used. Issues should include (but are not restricted to): <ul style="list-style-type: none"> <li>• Use of a one-stage or two-stage approach.</li> <li>• How effect estimates were generated separately within each study and combined across studies (where applicable).</li> </ul>                                                                                                                                                                                                               | 13-16            |

| PRISMA-IPD Section/topic            | Item No | Checklist item                                                                                                                                                                                                                                                                                                                                                                                                                                                                                                                                                                                                                                                                    | Reported on page |
|-------------------------------------|---------|-----------------------------------------------------------------------------------------------------------------------------------------------------------------------------------------------------------------------------------------------------------------------------------------------------------------------------------------------------------------------------------------------------------------------------------------------------------------------------------------------------------------------------------------------------------------------------------------------------------------------------------------------------------------------------------|------------------|
| <b>Title</b>                        |         |                                                                                                                                                                                                                                                                                                                                                                                                                                                                                                                                                                                                                                                                                   |                  |
|                                     |         | <ul style="list-style-type: none"> <li>• Specification of one-stage models (where applicable) including how clustering of patients within studies was accounted for.</li> <li>• Use of fixed or random effects models and any other model assumptions, such as proportional hazards.</li> <li>• How (summary) survival curves were generated (where applicable).</li> <li>• Methods for quantifying statistical heterogeneity (such as <math>I^2</math> and <math>\tau^2</math>).</li> <li>• How studies providing IPD and not providing IPD were analysed together (where applicable).</li> <li>• How missing data within the IPD were dealt with (where applicable).</li> </ul> |                  |
| Exploration of variation in effects | A2      | If applicable, describe any methods used to explore variation in effects by study or participant level characteristics (such as estimation of interactions between effect and covariates). State all participant-level characteristics that were analysed as potential effect modifiers, and whether these were pre-specified.                                                                                                                                                                                                                                                                                                                                                    | 13-16            |
| Risk of bias across studies         | 15      | Specify any assessment of risk of bias relating to the accumulated body of evidence, including any pertaining to not obtaining IPD for particular studies, outcomes or other variables.                                                                                                                                                                                                                                                                                                                                                                                                                                                                                           | 10, 16           |
| Additional analyses                 | 16      | Describe methods of any additional analyses, including sensitivity analyses. State which of these were pre-specified.                                                                                                                                                                                                                                                                                                                                                                                                                                                                                                                                                             | 8, 16            |
| <b>Results</b>                      |         |                                                                                                                                                                                                                                                                                                                                                                                                                                                                                                                                                                                                                                                                                   |                  |
| Study selection and IPD obtained    | 17      | Give numbers of studies screened, assessed for eligibility, and included in the systematic review with reasons for exclusions at each stage. Indicate the number of studies and participants for which IPD were sought and for which IPD were obtained. For those studies where IPD were not available, give the numbers of studies and participants for which aggregate data were available. Report reasons for non-availability of IPD. Include a flow diagram.                                                                                                                                                                                                                 | TBA              |
| Study characteristics               | 18      | For each study, present information on key study and participant characteristics (such as description of interventions, numbers of participants, demographic data, unavailability of outcomes, funding source, and if applicable duration of follow-up). Provide (main) citations for each study. Where applicable, also report similar study characteristics for any studies not providing IPD.                                                                                                                                                                                                                                                                                  | TBA              |
| IPD integrity                       | A3      | Report any important issues identified in checking IPD or state that there were none.                                                                                                                                                                                                                                                                                                                                                                                                                                                                                                                                                                                             | TBA              |
| Risk of bias within studies         | 19      | Present data on risk of bias assessments. If applicable, describe whether data checking led to the up-weighting or down-weighting of these assessments. Consider how any potential bias impacts on the robustness of meta-analysis conclusions.                                                                                                                                                                                                                                                                                                                                                                                                                                   | TBA              |
| Results of individual studies       | 20      | For each comparison and for each main outcome (benefit or harm), for each individual study report the number of eligible participants for which data were obtained and show simple summary data for each intervention group (including, where applicable, the number of events), effect estimates and confidence intervals. These may be tabulated or included on a forest                                                                                                                                                                                                                                                                                                        | TBA              |

| PRISMA-IPD Section/topic    | Item No | Checklist item                                                                                                                                                                                                                                                                                                                          | Reported on page |
|-----------------------------|---------|-----------------------------------------------------------------------------------------------------------------------------------------------------------------------------------------------------------------------------------------------------------------------------------------------------------------------------------------|------------------|
| <b>Title</b>                |         |                                                                                                                                                                                                                                                                                                                                         |                  |
|                             |         | plot.                                                                                                                                                                                                                                                                                                                                   |                  |
| Results of syntheses        | 21      | Present summary effects for each meta-analysis undertaken, including confidence intervals and measures of statistical heterogeneity. State whether the analysis was pre-specified, and report the numbers of studies and participants and, where applicable, the number of events on which it is based.                                 | TBA              |
|                             |         | When exploring variation in effects due to patient or study characteristics, present summary interaction estimates for each characteristic examined, including confidence intervals and measures of statistical heterogeneity. State whether the analysis was pre-specified. State whether any interaction is consistent across trials. |                  |
|                             |         | Provide a description of the direction and size of effect in terms meaningful to those who would put findings into practice.                                                                                                                                                                                                            |                  |
| Risk of bias across studies | 22      | Present results of any assessment of risk of bias relating to the accumulated body of evidence, including any pertaining to the availability and representativeness of available studies, outcomes or other variables.                                                                                                                  | TBA              |
| Additional analyses         | 23      | Give results of any additional analyses (e.g. sensitivity analyses). If applicable, this should also include any analyses that incorporate aggregate data for studies that do not have IPD. If applicable, summarise the main meta-analysis results following the inclusion or exclusion of studies for which IPD were not available.   | TBA              |
| <b>Discussion</b>           |         |                                                                                                                                                                                                                                                                                                                                         |                  |
| Summary of evidence         | 24      | Summarise the main findings, including the strength of evidence for each main outcome.                                                                                                                                                                                                                                                  | TBA              |
| Strengths and limitations   | 25      | Discuss any important strengths and limitations of the evidence including the benefits of access to IPD and any limitations arising from IPD that were not available.                                                                                                                                                                   | TBA              |
| Conclusions                 | 26      | Provide a general interpretation of the findings in the context of other evidence.                                                                                                                                                                                                                                                      | TBA              |
| Implications                | A4      | Consider relevance to key groups (such as policy makers, service providers and service users). Consider implications for future research.                                                                                                                                                                                               | TBA              |
| <b>Funding</b>              |         |                                                                                                                                                                                                                                                                                                                                         |                  |
| Funding                     | 27      | Describe sources of funding and other support (such as supply of IPD), and the role in the systematic review of those providing such support.                                                                                                                                                                                           | 20-21            |

1  
2 **A1 – A3 denote new items that are additional to standard PRISMA items. A4 has been created as a result of re-arranging content of the standard PRISMA**  
3 **statement to suit the way that systematic review IPD meta-analyses are reported.**  
4

5 © Reproduced with permission of the PRISMA IPD Group, which encourages sharing and reuse for non-commercial purposes  
6  
7  
8  
9  
10  
11  
12  
13  
14  
15  
16  
17  
18  
19  
20  
21  
22  
23  
24  
25  
26  
27  
28  
29  
30  
31  
32  
33  
34  
35  
36  
37  
38  
39  
40  
41  
42  
43  
44  
45  
46

For peer review only



1  
2  
3  
4  
5  
6  
7  
8  
9  
10  
11  
12  
13  
14  
15  
16  
17  
18  
19  
20  
21  
22  
23  
24  
25  
26  
27  
28  
29  
30  
31  
32  
33  
34  
35  
36  
37  
38  
39  
40  
41  
42  
43  
44  
45  
46

For peer review only

# BMJ Open

## Androgens In Men Study (AIMS): protocol for meta-analyses of individual participant data investigating associations of androgens with health outcomes in men.

|                               |                                                                                                                                                                                                                                                                                                                                                                                                                                                                                                                                                                                                                                                                                                                                                                                                                                                                                                                                                                                                                                                                                                                                                                                                                                                                                                                                                                                                                                                                                                                                                                                                                                                                                                                                                                                                                                                                                                                                                                                                                                                                                                                                                                                                                                                                                                                                                            |
|-------------------------------|------------------------------------------------------------------------------------------------------------------------------------------------------------------------------------------------------------------------------------------------------------------------------------------------------------------------------------------------------------------------------------------------------------------------------------------------------------------------------------------------------------------------------------------------------------------------------------------------------------------------------------------------------------------------------------------------------------------------------------------------------------------------------------------------------------------------------------------------------------------------------------------------------------------------------------------------------------------------------------------------------------------------------------------------------------------------------------------------------------------------------------------------------------------------------------------------------------------------------------------------------------------------------------------------------------------------------------------------------------------------------------------------------------------------------------------------------------------------------------------------------------------------------------------------------------------------------------------------------------------------------------------------------------------------------------------------------------------------------------------------------------------------------------------------------------------------------------------------------------------------------------------------------------------------------------------------------------------------------------------------------------------------------------------------------------------------------------------------------------------------------------------------------------------------------------------------------------------------------------------------------------------------------------------------------------------------------------------------------------|
| Journal:                      | <i>BMJ Open</i>                                                                                                                                                                                                                                                                                                                                                                                                                                                                                                                                                                                                                                                                                                                                                                                                                                                                                                                                                                                                                                                                                                                                                                                                                                                                                                                                                                                                                                                                                                                                                                                                                                                                                                                                                                                                                                                                                                                                                                                                                                                                                                                                                                                                                                                                                                                                            |
| Manuscript ID                 | bmjopen-2019-034777.R1                                                                                                                                                                                                                                                                                                                                                                                                                                                                                                                                                                                                                                                                                                                                                                                                                                                                                                                                                                                                                                                                                                                                                                                                                                                                                                                                                                                                                                                                                                                                                                                                                                                                                                                                                                                                                                                                                                                                                                                                                                                                                                                                                                                                                                                                                                                                     |
| Article Type:                 | Protocol                                                                                                                                                                                                                                                                                                                                                                                                                                                                                                                                                                                                                                                                                                                                                                                                                                                                                                                                                                                                                                                                                                                                                                                                                                                                                                                                                                                                                                                                                                                                                                                                                                                                                                                                                                                                                                                                                                                                                                                                                                                                                                                                                                                                                                                                                                                                                   |
| Date Submitted by the Author: | 28-Nov-2019                                                                                                                                                                                                                                                                                                                                                                                                                                                                                                                                                                                                                                                                                                                                                                                                                                                                                                                                                                                                                                                                                                                                                                                                                                                                                                                                                                                                                                                                                                                                                                                                                                                                                                                                                                                                                                                                                                                                                                                                                                                                                                                                                                                                                                                                                                                                                |
| Complete List of Authors:     | <p>Yeap, Bu; University of Western Australia, Medical School; Fiona Stanley Hospital, Department of Endocrinology and Diabetes<br/> Marriott, Ross; University of Western Australia, School of Population and Global Health<br/> Adams, Robert; Flinders University, Adelaide Institute for Sleep Health<br/> Antonio, Leen; KU Leuven, Clinical and Experimental Endocrinology<br/> Ballantyne, Christie; Baylor College of Medicine, Internal Medicine<br/> Bhasin, Shalender; Harvard Medical School<br/> Cawthon, PM; California Pacific Medical Center Research Institute, San Francisco Coordinating Center<br/> Couper, David; University of North Carolina at Chapel Hill, Gillings School of Global Public Health<br/> Dobs, Adrian; Johns Hopkins University, School of Medicine, Division of Endocrinology, Diabetes and Metabolism<br/> Flicker, Leon; University of Western Australia, WA Centre for Health &amp; Ageing<br/> Karlsson, Magnus; Lund University, Department of Clinical Sciences and Orthopedic Surgery<br/> Martin, Sean A.; The University of Adelaide, Freemasons Foundation Centre for Men's Health<br/> Matsumoto, AM; VA Puget Sound Health Care System, Geriatric Research, Education and Clinical Center; University of Washington System, Medicine<br/> Mellström, Dan ; University of Gothenburg, Centre for Bone and Arthritis Research at the Sahlgrenska Academy, Institute of Medicine<br/> Norman, Paul; University of Western Australia, Medical School<br/> Ohlsson , C; University of Gothenburg, Centre for Bone and Arthritis Research at the Sahlgrenska Academy, Institute of Medicine<br/> Orwoll, Eric; Oregon Health &amp; Science University<br/> O'Neill, Terence; The University of Manchester &amp; NIHR Manchester Biomedical Research Centre, Centre for Epidemiology Versus Arthritis, Faculty of Biology, Medicine and Health; Manchester Academic Health Science Centre, Manchester University NHS Foundation Trust<br/> Shores, Molly; VA Puget Sound Health Care System; University of Washington, School of Medicine, Department of Psychiatry and Behavioral Sciences<br/> Travison, Thomas; Beth Israel Deaconess Medical Center, Institute for Aging Research, Hebrew SeniorLife; Harvard Medical School<br/> Vanderschueren, Dirk; Katholieke Universiteit Leuven, Department of</p> |

|                                    |                                                                                                                                                                                                                                                                                                                                                                                               |
|------------------------------------|-----------------------------------------------------------------------------------------------------------------------------------------------------------------------------------------------------------------------------------------------------------------------------------------------------------------------------------------------------------------------------------------------|
|                                    | Chronic Diseases, Metabolism and Ageing (CHROMETA), Laboratory of Clinical and Experimental Endocrinology<br>Wittert, Gary; The University of Adelaide, Freemasons Centre for Men's Health<br>Wu, Frederick; The University of Manchester, Division of Diabetes, Endocrinology and Gastroenterology<br>Murray, Kevin; University of Western Australia, School of Population and Global Health |
| <b>Primary Subject Heading</b> :   | Diabetes and endocrinology                                                                                                                                                                                                                                                                                                                                                                    |
| <b>Secondary Subject Heading</b> : | Epidemiology                                                                                                                                                                                                                                                                                                                                                                                  |
| <b>Keywords</b> :                  | Sex steroids & HRT < DIABETES & ENDOCRINOLOGY, EPIDEMIOLOGY, General endocrinology < DIABETES & ENDOCRINOLOGY                                                                                                                                                                                                                                                                                 |
|                                    |                                                                                                                                                                                                                                                                                                                                                                                               |

SCHOLARONE™  
Manuscripts

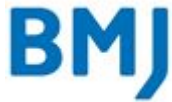

I, the Submitting Author has the right to grant and does grant on behalf of all authors of the Work (as defined in the below author licence), an exclusive licence and/or a non-exclusive licence for contributions from authors who are: i) UK Crown employees; ii) where BMJ has agreed a CC-BY licence shall apply, and/or iii) in accordance with the terms applicable for US Federal Government officers or employees acting as part of their official duties; on a worldwide, perpetual, irrevocable, royalty-free basis to BMJ Publishing Group Ltd ("BMJ") its licensees and where the relevant Journal is co-owned by BMJ to the co-owners of the Journal, to publish the Work in this journal and any other BMJ products and to exploit all rights, as set out in our [licence](#).

The Submitting Author accepts and understands that any supply made under these terms is made by BMJ to the Submitting Author unless you are acting as an employee on behalf of your employer or a postgraduate student of an affiliated institution which is paying any applicable article publishing charge ("APC") for Open Access articles. Where the Submitting Author wishes to make the Work available on an Open Access basis (and intends to pay the relevant APC), the terms of reuse of such Open Access shall be governed by a Creative Commons licence – details of these licences and which [Creative Commons](#) licence will apply to this Work are set out in our licence referred to above.

Other than as permitted in any relevant BMJ Author's Self Archiving Policies, I confirm this Work has not been accepted for publication elsewhere, is not being considered for publication elsewhere and does not duplicate material already published. I confirm all authors consent to publication of this Work and authorise the granting of this licence.

1  
2  
3 1 Androgens In Men Study (AIMS): protocol for meta-analyses of individual participant data  
4  
5 2 investigating associations of androgens with health outcomes in men.  
6  
7  
8 3

9  
10 4 Corresponding author

11  
12 5 Dr Bu B. Yeap MBBS, FRACP, PhD, Harry Perkins Institute of Medical Research, 11 Robin  
13  
14 6 Warren Drive, Murdoch 6150, Western Australia, Australia.

15  
16  
17 7 Email: [bu.yeap@uwa.edu.au](mailto:bu.yeap@uwa.edu.au); Telephone: +61 8 6151 1149  
18  
19 8

20  
21 9 Authors:

22  
23  
24 10 Bu B. Yeap, Medical School, The University of Western Australia, Perth 6009, Australia.

25  
26 11 Ross J. Marriott, School of Population and Global Health, The University of Western  
27  
28 12 Australia, Perth 6009, Australia.

29  
30 13 Robert J. Adams, Adelaide Institute for Sleep Health, Flinders University, Bedford Park  
31  
32 14 5042, Australia.

33  
34 15 Leen Antonio, Clinical and Experimental Endocrinology, KU Leuven, Leuven, Belgium.

35  
36 16 Christie M. Ballantyne, Internal Medicine, Baylor College of Medicine, Houston, Texas,  
37  
38 17 USA.

39  
40 18 Shalender Bhasin, Harvard Medical School, Boston, Massachusetts, USA.

41  
42 19 Peggy M. Cawthon, San Francisco Coordinating Center, California Pacific Medical Center  
43  
44 20 Research Institute, San Francisco, California, USA.

45  
46 21 David J. Couper, Gillings School of Global Public Health, University of North Carolina at  
47  
48 22 Chapel Hill, Chapel Hill, North Carolina, USA.

49  
50 23 Adrian S. Dobs, School of Medicine, Division of Endocrinology, Diabetes and Metabolism,  
51  
52 24 Johns Hopkins University, Baltimore, Maryland, USA.  
53  
54  
55  
56  
57  
58  
59  
60

- 1  
2  
3 25 Leon Flicker, WA Centre for Health & Ageing, The University of Western Australia, Perth  
4  
5 26 6009, Australia.  
6  
7 27 Magnus Karlsson, Department of Clinical Sciences and Orthopedic Surgery, Lund  
8  
9 28 University, Lund, Sweden.  
10  
11 29 Sean A. Martin, Freemasons Foundation Centre for Men's Health, The University of  
12  
13 30 Adelaide, Adelaide 5000, Australia.  
14  
15 31 Alvin M. Matsumoto, Geriatric Research, Education and Clinical Center, VA Puget Sound  
16  
17 32 Health Care System, Seattle, Washington, USA.  
18  
19 33 Dan Mellström, Centre for Bone and Arthritis Research at the Sahlgrenska Academy,  
20  
21 34 Institute of Medicine, University of Gothenburg, Goteburg, Sweden.  
22  
23 35 Paul E. Norman, Medical School, The University of Western Australia, Fremantle 6160,  
24  
25 36 Australia.  
26  
27 37 Claes Ohlsson, Centre for Bone and Arthritis Research at the Sahlgrenska Academy, Institute  
28  
29 38 of Medicine, University of Gothenburg, Goteburg, Sweden.  
30  
31 39 Eric S. Orwoll, Oregon Health & Science University, Portland, Oregon, USA.  
32  
33 40 Terence W. O'Neill, Centre for Epidemiology Versus Arthritis, Faculty of Biology, Medicine  
34  
35 41 and Health, The University of Manchester & NIHR Biomedical Research Centre,  
36  
37 42 Manchester, United Kingdom.  
38  
39 43 Molly M. Shores, VA Puget Sound Health Care System, Seattle, Washington, United States.  
40  
41 44 Thomas G. Travison, Institute for Aging Research, Hebrew SeniorLife, Beth Israel  
42  
43 45 Deaconess Medical Center, Boston, Massachusetts, USA.  
44  
45 46 Dirk Vanderschueren, Department of Chronic Diseases, Metabolism and Ageing  
46  
47 47 (CHROMETA), Laboratory of Clinical and Experimental Endocrinology, Katholieke  
48  
49 48 Universiteit Leuven, Leuven, Flanders, Belgium.  
50  
51  
52  
53  
54  
55  
56  
57  
58  
59  
60

1  
2  
3 49 Gary A. Wittert, Freemasons Foundation Centre for Men's Health, The University of  
4  
5 50 Adelaide, Adelaide 5000, Australia.  
6  
7 51 Frederick C. W. Wu., Division of Diabetes, Endocrinology and Gastroenterology, The  
8  
9 52 University of Manchester, Manchester, United Kingdom.  
10  
11  
12 53 Kevin Murray, School of Population and Global Health, The University of Western Australia,  
13  
14 54 Perth 6009, Australia.  
15  
16  
17 55  
18  
19 56 Word count, excluding title page, abstract, references, acknowledgements, contributions,  
20  
21 57 figures and tables:  
22  
23  
24 58  
25  
26 59 3,436 words.  
27  
28  
29  
30  
31  
32  
33  
34  
35  
36  
37  
38  
39  
40  
41  
42  
43  
44  
45  
46  
47  
48  
49  
50  
51  
52  
53  
54  
55  
56  
57  
58  
59  
60

## 62 **ABSTRACT**

### 63 **Introduction**

64 This study aims to clarify the role(s) of endogenous sex hormones to influence health  
65 outcomes in men, specifically to define the associations of plasma testosterone with incidence  
66 of cardiovascular events, cancer, dementia and mortality risk, and to identify factors  
67 predicting testosterone concentrations. Data will be accrued from at least three Australian,  
68 two European, and four North American population-based cohorts involving approximately  
69 20,000 men.

### 70 **Methods and analysis**

71 Eligible studies include prospective cohort studies with baseline testosterone concentrations  
72 measured using mass spectrometry and five years of follow-up data on incident  
73 cardiovascular events, mortality, cancer diagnoses or deaths, new onset dementia, or decline  
74 in cognitive function recorded. Data for men, who were not taking androgens or drugs  
75 suppressing testosterone production, metabolism, or action; and had no prior orchidectomy,  
76 are eligible. No date range was set for searches. Aggregate level data will be sought where  
77 individual participant data (IPD) is not available. One-stage IPD random-effects meta-  
78 analyses will be performed, using linear mixed models, generalised linear mixed models and  
79 either stratified or frailty-augmented Cox regression models. Heterogeneity in estimates from  
80 different studies will be quantified and bias investigated using funnel plots. Effect size  
81 estimates will be presented in forest plots and non-negligible heterogeneity and bias  
82 investigated using subgroup or meta-regression analyses.

### 83 **Ethics and dissemination**

84 Ethics approvals obtained for each of the participating cohorts state that participants have  
85 consented to have their data collected and used for research purposes. There are four planned



1  
2  
3 86 research articles, with each involving a separate set of IPD meta-analyses (articles will  
4  
5 87 investigate different, distinct outcomes).

6  
7  
8 88 **Registration** PROSPERO Registration No. CRD42019139668.  
9

10 89

## 11 12 90 **STRENGTHS AND LIMITATIONS OF THIS STUDY**

- 13  
14  
15 91 • The IPD meta-analyses are likely to have higher statistical power than and provide greater  
16  
17 92 scope to control for important confounders and risk factors than previous meta-analyses  
18  
19 93 on this topic.  
20  
21 94 • Investigators from nine large prospective cohort studies (each with N > 1,000  
22  
23 95 participants) have agreed to collaborate., with additional studies to be identified from  
24  
25 96 systematic review.  
26  
27 97 • Harmonization will be required for some variables (e.g., physical activity, alcohol  
28  
29 98 consumption) that are recorded differently among the component studies, and aggregate-  
30  
31 99 level data will be sought where IPD-level data are not available.  
32  
33  
34  
35 100 • As this is an observational study, it will not fully eliminate the possibility of confounding  
36  
37 101 influences of unadjusted effects.  
38  
39  
40 102 • However, unlike a randomised controlled trial, this study will provide a more  
41  
42 103 comprehensive characterisation of temporal relationships between baseline androgen  
43  
44 104 concentrations and health outcomes in community-dwelling adult males.  
45  
46  
47 105

## 106 INTRODUCTION

107 As men grow older, testosterone production and circulating concentrations of testosterone  
108 decline while comorbidities accumulate.[1-4] Older men, even those in very good health,  
109 have lower circulating testosterone concentrations compared with healthy young men.[5, 6]  
110 Although results have been inconsistent, an increasing number of studies have reported  
111 associations of low endogenous testosterone concentration with poorer health outcomes,  
112 especially in older men. For instance, studies that have used liquid chromatography tandem  
113 mass spectrometry, widely regarded as the reference method for the measurement of total  
114 testosterone concentrations,[7] have reported associations of lower endogenous testosterone  
115 concentrations with: (i) cardiovascular disease and all-cause mortality in some cases[8-15]  
116 but not others[8, 16-20]; (ii) some cancers but not others[21, 22]; and (iii) dementia[23, 24]  
117 but not laboratory measures of cognitive function.[25] Therefore it remains unclear whether  
118 testosterone is a biomarker of ill-health or a causal factor for diseases of ageing.

119  
120 Currently, testosterone treatment is recommended for men who have symptoms and signs of  
121 androgen deficiency and low testosterone concentrations, due to disease of the hypothalamus,  
122 pituitary or testes (organic or pathological hypogonadism).[26-29] Randomised controlled  
123 trials of testosterone treatment in men aged 65 and older with low-normal testosterone  
124 concentrations without organic hypogonadism have shown modest benefits on sexual  
125 function, anaemia, self-reported physical function and mobility, and volumetric bone density,  
126 but not on some objective measures of cognition over 12 to 36 months.[30-34] The effect of  
127 testosterone on major adverse cardiovascular events remains unclear.[35, 36] However, the  
128 selection criteria of these trials was such that the screening to enrolment ratio was 65:1, a  
129 highly selected population of older men.[32, 33, 36] Importantly, the trials were neither large  
130 enough nor long enough to determine the effects of testosterone on major adverse

1  
2  
3 131 cardiovascular events, development of dementia, bone fractures, and mortality.[36]  
4  
5 132 Therefore, a meta-analysis of data from prospective cohort studies, with extended follow-up  
6  
7 133 periods, provides opportunities for better understanding of the temporal profiles of the  
8  
9  
10 134 postulated associations between endogenous testosterone concentration and incident health  
11  
12 135 outcomes. Meta-analyses of Individual Participant Data (IPD) are generally preferable to  
13  
14 136 meta-analyses of aggregate data in that they typically have higher statistical power and  
15  
16  
17 137 provide scope to control for important confounders and risk factors.[37, 38] Furthermore,  
18  
19 138 one-stage IPD meta-analyses are preferable to two-stage approaches because the former uses  
20  
21 139 an exact likelihood to directly model the distribution of IPD, offers the convenience of using  
22  
23 140 a standard set of diagnostic tools to assess model fit, and can arguably provide greater  
24  
25  
26 141 flexibility, in terms of options for statistical modelling.[39, 40]  
27  
28 142  
29  
30 143 The Androgens In Men Study (AIMS), an international collaboration of prospective cohort  
31  
32 144 studies, will examine the associations of sex hormones (comprising testosterone and  
33  
34 145 dihydrotestosterone as the major androgens, and estradiol as the major estrogen, in the  
35  
36 146 circulation) with health outcomes that are major sources of morbidity and mortality in  
37  
38 147 middle-aged and older men. The group will perform a series of IPD meta-analyses to clarify  
39  
40 148 the influence of sex hormone exposures on major health outcomes, including heart attack,  
41  
42 149 stroke and cardiovascular deaths, cancer, new-onset dementia, and all-cause mortality, as  
43  
44 150 well as provide information on social, demographic and behavioural factors that are  
45  
46 151 associated with endogenous testosterone concentrations. This work will characterise robustly  
47  
48 152 the associations of several sex hormones with health outcomes in men in general over and  
49  
50 153 above the study-specific estimates, and thus clarify the role of androgens as biomarkers for,  
51  
52 154 or causal contributors to, men's health. The work outlined in this document will be conducted  
53  
54 155 from 1 February 2019 to 30 November 2020.  
55  
56  
57  
58  
59  
60

156

**157 Objectives**

158 The Androgens In Men Study (AIMS) will establish an international collaboration of existing  
159 cohort studies to clarify the relation of endogenous sex hormones with major health outcomes  
160 in men. PEO (Population, Exposure, Outcomes) characteristics include: adult men in the  
161 general community; an exposure of endogenous circulating sex hormone concentration,  
162 primarily testosterone, as the principal male sex hormone or androgen; and a prospective  
163 cohort study type, with incident health outcomes including incidence of cardiovascular  
164 disease events, mortality, cancers, and dementia. The specific objectives of the AIMS study  
165 are: to investigate associations between variables representing social, demographic, and  
166 behavioural factors with the measured concentration of testosterone in the blood of men  
167 (Analysis 1); to examine the associations between testosterone concentrations and subsequent  
168 incidence of cardiovascular events, cardiovascular deaths, and all-cause mortality in men  
169 (Analysis 2); to examine the associations between testosterone concentrations and subsequent  
170 mortality from (and, if available, diagnoses of) common cancers in men (Analysis 3); to  
171 examine the associations between testosterone concentrations and cognitive impairment and  
172 incident dementia in men (Analysis 4). Analysis 2 will evaluate myocardial infarction, stroke  
173 and heart failure, deaths due to cardiovascular disease, and the composite endpoint of major  
174 adverse cardiovascular events (MACE) comprising non-fatal myocardial infarction, non-fatal  
175 stroke, and deaths due to cardiovascular disease. Analysis 3 will evaluate outcomes of deaths  
176 due to and diagnoses of colorectal cancer, lung cancer and prostate cancer.

177

## 178 **METHODS AND ANALYSIS**

179 IPD meta-analyses will be conducted to understand the associations between testosterone and  
180 a range of associated major health outcomes in men. IPD meta-analyses have been selected  
181 as the most suitable approach because: (i) the required aggregate data (AD) are not available  
182 from each of the cohorts in published literature; (ii) IPD meta-analyses typically have higher  
183 statistical power than AD meta-analyses and provide scope for controlling for important  
184 confounders and risk factors.[37, 38] Where possible, methods will adhere to the guidelines  
185 for Preferred Reporting Items for Systematic Reviews and Meta-Analyses of IPD data  
186 (PRISMA-IPD; completed checklist is provided in Supplementary Material) and the Meta-  
187 analysis Of Observational Studies in Epidemiology (MOOSE).[41-43]

188

### 189 **Studies selected for inclusion in IPD meta-analyses**

190 Studies will be identified from a systematic review using online search tools for mainstream  
191 published (MEDLINE, EMBASE) and grey literature (OpenGrey, Mednar) studies. Eligible  
192 studies include prospective cohort studies with plasma or serum testosterone concentrations  
193 measured using mass spectrometry with at least five years of follow-up data, with incident  
194 cardiovascular, cancer, mortality, dementia, or cognitive events recorded (see Supplementary  
195 Table S1 for an example of search criteria to be used). The search strategy selects for articles  
196 based on words or Medical Subject Headings (MeSH) terms matching the relevant exposure  
197 (example steps 1-3), outcomes (example steps 4-10), and study type (example steps 14-15),  
198 then, depending on the search tool, filters down to more relevant studies, with exclusions of  
199 clinical trials and of studies on non-humans (example steps 18-27), with no date range  
200 restrictions. Ahead of the systematic review, nine eligible studies (cohorts) had expressed  
201 interest to collaborate: three from Australia (Busselton Health Study BHS, Health In Men  
202 Study HIMS, Men Androgen Inflammation Lifestyle Environment and Stress study

1  
2  
3 203 MAILES); two from Europe (European Male Ageing Study EMAS, Osteoporotic Fractures in  
4  
5 204 Men Study MrOS - Sweden); and four from the USA (Atherosclerosis Risk in Communities  
6  
7 205 study ARIC, Cardiovascular Health Study CHS, The Framingham Heart Study FHS,  
8  
9 206 Osteoporotic Fractures in Men Study MrOS - USA). Investigators from eight of these studies  
10  
11 207 have confirmed availability of suitable IPD-level data, provisional on approvals from their  
12  
13 208 respective Publication and Steering Committees. If it is not possible to obtain IPD-level data  
14  
15 209 from selected studies, we will request suitable AD-level data.  
16  
17  
18  
19  
20

21  
22

### 211 **Data provision, merging, harmonisation, and storage**

23  
24 212 The project manager will liaise directly with the nominated contact person for each cohort  
25  
26 213 study to identify, specifically, which variables and set of observations will be suitable to  
27  
28 214 request. A data request will then be submitted to the data custodian for each study. Requested  
29  
30 215 variables will be labelled as either “highly desirable” or “only if available”, in order to  
31  
32 216 prioritise efforts in obtaining the key variables for analyses and to acknowledge the differing  
33  
34 217 availability of variables among studies. A list of variable names, definitions, and attributes,  
35  
36 218 including numbers of rows and columns in each data file(s) will also be requested to be  
37  
38 219 provided separately. Methods for ascertaining outcome and comorbidity status will be  
39  
40 220 requested, which can be used to indicate the relative quality of diagnostic information (e.g.  
41  
42 221 ICD-coded diagnoses from hospital inpatient admissions versus self-report information). File  
43  
44 222 transfer will be achieved via encrypted file transfer (or other sufficiently secure method).  
45  
46  
47  
48  
49

223

50  
51 224 Once each dataset has been received by the project manager, the original file(s) will be saved  
52  
53 225 and date-stamped in a secure central repository. All subsequent manipulations will be  
54  
55 226 completed using copies of the original file, with syntax saved as script files. Variable  
56  
57 227 definitions will be checked, variables inspected for missing values, and variable properties  
58  
59  
60

1  
2  
3 228 and value ranges assessed to identify possible outliers. A table of summary statistics will be  
4  
5 229 calculated and, where possible, analyses run and compared with published values to check for  
6  
7 230 data consistency. The nature of any discrepancies identified from these checks will need to be  
8  
9  
10 231 understood, and possibly resolved, prior to proceeding with the meta-analyses.[42, 44, 45]  
11  
12  
13 232  
14  
15  
16 233 Depending on the extent of missing-ness, missing data will be suitably imputed.[45, 46] For  
17  
18 234 each analysis, we will conduct multiple imputations using a method that approximates as  
19  
20 235 close as possible to the substantive model.[47] The method will likely vary depending on the  
21  
22 236 analysis[48] and therefore we will consider adapting either a Fully Conditional Specification  
23  
24 237 (e.g., [49]) or Joint Modelling framework (e.g., [50]) to each case, as is appropriate. The  
25  
26 238 quality of imputations will be quantified by using re-imputed values to calculate the posterior  
27  
28 239 predictive p-values of relevant quantities.[51] Results from each of the multiply-imputed  
29  
30 240 datasets will be suitably pooled to obtain final estimates, standard errors, and 95% confidence  
31  
32 241 intervals.[52]  
33  
34  
35  
36  
37 242  
38  
39  
40 243 Prior to the merging of datasets, a variable to identify each source study will be appended as  
41  
42 244 the new first column. Variable formats will be checked and corrected for consistency and  
43  
44 245 anonymised participant identifier codes for uniqueness across all studies. Harmonization will  
45  
46 246 be required for some variables (e.g., physical activity, alcohol consumption) that are recorded  
47  
48 247 differently by the different component studies. Where possible, AD datasets will be used to  
49  
50 248 reconstruct IPD-level data (that is, partially-reconstructed IPD) prior to merging.[53-55]  
51  
52  
53 249 Should this not be possible, the IPD-level data will be aggregated and summary estimates  
54  
55 250 made with and without AD-level data as sensitivity analyses. It is also possible that some  
56  
57 251 studies might have outcomes available for some analyses, but not others; in these cases, we  
58  
59  
60

1  
2  
3 252 will preferentially use IPD-level data when available but also seek to use AD-level data from  
4  
5 253 those other studies when available. There is no requirement to use IPD-level data from the  
6  
7  
8 254 same studies across all analyses.  
9

10 255  
11  
12 256 All IPD-level data will be accessible to only the approved staff from a secure on-site facility,  
13  
14 257 from rooms that are kept locked when unattended, and with remote access not permitted.  
15  
16 258 IPD-level data are not to be printed in hard copy and will only be presented at aggregate  
17  
18 259 level. Data analysed for this study will be retained for five years after the last of all proposed  
19  
20 260 analyses are published and will then be destroyed. A post-analysis retention period is required  
21  
22 261 to enable publication and possible scrutiny of findings. Disposal will be carried out according  
23  
24  
25 262 to best practice.  
26  
27  
28  
29 263

#### 30 31 32 264 **Data items** 33

34  
35 265 The full list of generic variables to include in meta-analyses are presented in Table 1.  
36  
37 266 Analysis 1 will model relationships of total testosterone concentrations, as measured in serum  
38  
39 267 or plasma samples (dependent variable), with key demographic variables and risk factors for  
40  
41 268 disease (predictor variables). Time-to-event variables obtained from follow-up data will be  
42  
43 269 analysed in Analysis 2 and 3 (outcomes), and their associations with testosterone  
44  
45 270 concentrations (focal predictor) and other potential confounders and risk factors (predictor  
46  
47 271 variables). Records of dementia diagnoses (physician or otherwise categorised) and relative  
48  
49 272 cognitive function (for example, from test scores) will be analysed in Analysis 4, and their  
50  
51 273 associations with testosterone concentrations and other potential confounders and risk factors.  
52  
53  
54 274 Analyses of relationships with other sex hormones instead of testosterone, including  
55  
56 275 dihydrotestosterone, estradiol, luteinising hormone (LH), and Sex Hormone Binding Globulin  
57  
58  
59  
60



1  
2  
3 276 (SHBG), will be conducted where sufficient data is available. For exploratory analyses, free  
4  
5 277 testosterone, the amount in the circulation which is not protein-bound, will be calculated from  
6  
7 278 measured total testosterone and SHBG.[56] Covariates were selected to include those used in  
8  
9  
10 279 previous studies, as well as those that are typically recorded. The full list of proposed  
11  
12 280 variables to include in the meta-analyses are presented in Table 1.  
13  
14  
15 281

## 17 282 **Statistical analysis**

18  
19  
20 283 Since the datasets to be analysed are sampled from different populations, a random-effects  
21  
22 284 meta-analysis is appropriate, as it acknowledges that effects will vary among studies due to  
23  
24 285 differences in local factors.[57] One-stage IPD meta-analyses will be performed. Each IPD  
25  
26 286 meta-analysis will involve fitting a model with study estimated as either a fixed or random  
27  
28 287 term, to account for related observations within studies, and testosterone modelled as random  
29  
30  
31 288 slopes (when modelled as a continuous predictor) or intercepts (when modelled as a  
32  
33 289 categorical predictor), to harmonised, merged data from all cohorts. The underlying statistical  
34  
35  
36 290 model and estimates of effect size will be specific to each of the proposed analyses and are  
37  
38 291 outlined as follows.  
39  
40  
41 292

42  
43  
44 293 *Analysis 1: Factors associated with testosterone concentrations in men and characterisation*  
45  
46 294 *of reference ranges.*

47  
48  
49 295 Linear Mixed Models (LMMs) or Generalised Linear Mixed Models (GLMMs) will be used  
50  
51 296 to model the relation between the predictors (independent variables) and each hormonal  
52  
53 297 variable (testosterone, dihydrotestosterone, estradiol, LH, SHBG) as five separate IPD meta-  
54  
55 298 analyses. Suspected non-linear relationships, at the scale of the linear predictor, will be  
56  
57  
58 299 investigated and modelled appropriately (e.g., splines with pre-set knot locations and linear  
59  
60

1  
2  
3 300 boundary constraints). Measures of effect size may include (but are not limited to):  $\eta^2$ , [58,  
4  
5 301 59] Pearson's  $r$ , standardised mean difference to the reference level (categorical predictors),  
6  
7 302 standardised difference for an increase in one standard deviation (continuous predictors). In  
8  
9 303 the case of non-linear relations, we will graphically describe the relationship with  
10  
11 304 comparisons made with appropriate reference points. Reference ranges will be derived based  
12  
13 305 on the distributions of testosterone in healthy men.  
14  
15  
16  
17  
18 306

19  
20 307 *Analysis 2: Associations between testosterone concentrations and subsequent incidence of*  
21  
22 308 *cardiovascular events, cardiovascular deaths, and all-cause mortality.*  
23  
24

25 309 Cox proportional hazards models will be used to assess the effect of testosterone level on the  
26  
27 310 incident risk of each outcome, with separate IPD meta-analyses conducted for each outcome  
28  
29 311 (myocardial infarction, stroke, heart failure, deaths due to cardiovascular disease, and  
30  
31 312 MACE) and each hormonal variable (testosterone, dihydrotestosterone, estradiol, LH,  
32  
33 313 SHBG). Component study will be modelled either as a stratified variable [39] or as a random  
34  
35 314 term, and testosterone as a random term, using frailty models, which are a class of survival  
36  
37 315 models that incorporate random effects. [60-62] Participants with prevalent cardiovascular  
38  
39 316 disease at baseline will be excluded. The length of follow-up will also be standardised among  
40  
41 317 studies in order to maximise data from all datasets, whilst minimising the prospect for  
42  
43 318 variable lengths-to-follow-up among studies introducing additional heterogeneity into  
44  
45 319 results. [46]  
46  
47  
48  
49  
50

51 320

52  
53  
54 321 Multivariable versions of each of these models will also be fitted, with additional predictors  
55  
56 322 for potential confounders and risk factors included (Table 1). Non-linear associations for  
57  
58 323 continuous variables will be modelled using natural splines with pre-specified knots and  
59  
60

1  
2  
3 324 linear boundary constraints. The (standardised) measure of effect size used will be the hazard  
4  
5 325 ratio. Subgroup analyses will be conducted separately for each of three specific types of  
6  
7 326 cardiovascular disease (outcomes): myocardial infarction, stroke and heart failure.  
8  
9

10  
11 327

12  
13 328 *Analysis 3: Association between testosterone level and subsequent incidence of cancer.*

14  
15 329 Cox proportional hazards models will be used to assess the effect of testosterone

16  
17 330 concentrations on the incident risk of cancer deaths and, if available, of cancer diagnoses.

18  
19 331 IPD meta-analyses separately conducted for each of these outcomes and each hormonal

20  
21 332 variable as focal predictor (testosterone, dihydrotestosterone, estradiol, LH, SHBG).

22  
23 333 Component study will be modelled either as a stratified variable[39] or as a random term, and

24  
25 334 testosterone as a random term, using frailty models.[60-62] Participants with prevalent cancer

26  
27 335 diagnosis at baseline will be excluded. The length of follow-up will be standardised among

28  
29 336 studies in order to maximise data from all datasets, whilst minimising the prospect for

30  
31 337 variable lengths-to-follow-up among studies introducing additional heterogeneity into

32  
33 338 results.[46]  
34  
35  
36  
37  
38

39 339

40  
41 340 Multivariable versions of each of these models will also be fitted, with additional predictors

42  
43 341 for potential confounders and risk factors included (Table 1). Non-linear associations for

44  
45 342 continuous variables will be modelled using natural splines with pre-specified knots and

46  
47 343 linear boundary constraints. The (standardised) measure of effect size used will be the hazard

48  
49 344 ratio. Subgroup analyses will be conducted separately for each of three common types of

50  
51 345 cancers in men (outcomes): colorectal cancer, lung cancer, prostate cancer. For these

52  
53 346 analyses, men with the relevant cancer type at baseline will be excluded from that specific

54  
55 347 analysis. Thus men with prevalent colorectal cancer (but not other cancer types) will be  
56  
57  
58  
59  
60

1  
2  
3 348 excluded in the analysis of incident colorectal cancer; similarly for the analyses of incident  
4  
5 349 lung and prostate cancer, men with lung or prostate cancer at baseline will be excluded.  
6  
7

8 350

9  
10 351 *Analysis 4: Associations of testosterone levels with cognitive impairment and incident*  
11  
12  
13 352 *dementia in men.*  
14

15 353 LMMs and GLMMs will be used to model the association of testosterone concentrations with  
16  
17 354 cognitive impairment (cross-sectional analyses of baseline data). Cox proportional hazards  
18  
19 355 models will be used to assess the effect of testosterone concentrations on the incident risk of  
20  
21 356 dementia. Men with prevalent dementia will be excluded from this analysis. We will also ask  
22  
23 357 for follow-up cognition test scores, and if available, will run an analysis of changes in  
24  
25 358 cognition test scores from baseline as an outcome. Separate IPD meta-analyses will be  
26  
27 359 conducted for each hormonal variable as a focal predictor (testosterone, dihydrotestosterone,  
28  
29 360 estradiol, LH, SHBG). Component study will be modelled as a fixed or random intercept  
30  
31 361 term in LMMs and GLMMs and as a stratified factor or frailty model random term in Cox  
32  
33 362 regressions. Multivariable versions of each of these models will also be fitted, with additional  
34  
35 363 predictors for potential confounders and risk factors included (Table 1). Suspected non-linear  
36  
37 364 relationships, at the scale of the linear predictor, will be investigated and modelled using  
38  
39 365 splines with pre-specified knots and boundary constraints. Measures of effect size may  
40  
41 366 include:  $\eta^2$ , Pearson's  $r$ , standardised mean difference to the reference level (categorical  
42  
43 367 predictors), standardised difference for an increase in one standard deviation (continuous  
44  
45 368 predictors), odds ratio for LMMs and GLMMs and hazard ratio for Cox regressions.  
46  
47  
48  
49

50 369

51  
52  
53 370 Throughout all analyses, contour-enhanced funnel plots will be constructed to visually assess  
54  
55 371 patterns in estimates of effect sizes and precision among studies, to investigate heterogeneity  
56  
57  
58 372 and possible meta-biases.[63-65] The relative amount of heterogeneity will be estimated  
59  
60

1  
2  
3 373 (e.g., using  $I^2$ ) and forest plots presented. Subgroup or meta-regression analyses may be  
4  
5 374 conducted if pronounced heterogeneity is estimated.[57]  
6  
7  
8 375

9  
10 376 **Patient and public involvement**

11  
12 377 This IPD meta-analysis will use existing secondary data. Patients and public were not  
13  
14 378 involved in the design, recruitment or conduct of this IPD meta-analysis. The results of this  
15  
16 379 study will be shared with the primary investigators of the shared studies and disseminated as  
17  
18 380 publications in open-access journals.  
19  
20  
21 381

22  
23  
24 382 **ETHICS AND DISSEMINATION**

25  
26 383 Ethics approvals obtained for each of the participating cohorts state that participants have  
27  
28 384 consented to have their data collected and used for research purposes. Furthermore, there are  
29  
30 385 no expected harms or risks to participants, as data have already been collected within each  
31  
32 386 individual cohort, under existing ethics approvals. De-identified data will be collated and  
33  
34 387 analysed, with no new procedures planned for participants. The AIMS study has been  
35  
36 388 assessed as exempt from ethics review by the Human Research Ethics Office at the  
37  
38 389 University of Western Australia (file reference number RA/4/20/5014).  
39  
40  
41 390

42  
43  
44 391 **DISCUSSION**

45  
46 392 Although several published meta-analyses have investigated associations of endogenous  
47  
48 393 testosterone with health outcomes in men,[66-77] none have conducted IPD meta-analyses of  
49  
50 394 health outcomes as planned for this study. A previous IPD meta-analysis focussed on the  
51  
52 395 outcome of metabolic syndrome.[69] Results from this study will improve upon previously  
53  
54 396 published estimates from individual studies, in terms of the generalisability of findings.  
55  
56 397 Estimates from the IPD meta-analyses are also likely to be more reliable than those published  
57  
58  
59  
60

1  
2  
3 398 from conventional meta-analyses because they typically have higher statistical power and  
4  
5 399 provide scope for controlling for important confounders and risk factors.[37, 38] Uncertainty  
6  
7 400 will undoubtedly remain due to the possibility of confounding influences of unadjusted  
8  
9 401 effects. However, unlike a randomised controlled trial, this study avoids the need to subject  
10  
11 402 individuals to interventions, and provides more comprehensive characterisation of temporal  
12  
13 403 relationships between baseline testosterone concentrations and a range of key health  
14  
15 404 outcomes.[78]  
16  
17  
18  
19  
20

405

21 406 Accordingly, it is hoped that the AIMS collaboration will ultimately complement the research  
22  
23 407 efforts and outputs from multiple prospective cohort studies by drawing upon the collective  
24  
25 408 body of evidence to clarify the role of endogenous sex hormone levels on major health  
26  
27 409 outcomes in men. It is possible that this work might also elucidate new understanding, arising  
28  
29 410 from improved scope for fitting more complex models due to increased statistical power, or  
30  
31 411 from patterns detected in subgroup or meta-regression analyses. Clinically, research outputs  
32  
33 412 will be used to identify the scope and optimal recruitment criteria for future trials of  
34  
35 413 testosterone therapy. These data will also allow reference ranges for testosterone in men  
36  
37 414 across ages and geographical locations to be refined, to inform recommendations for clinical  
38  
39 415 practice more generally.  
40  
41  
42  
43  
44

416

#### 417 **Acknowledgements**

418 We thank Östen Ljunggren of the Department of Medical Sciences, Uppsala University and  
49  
50 419 Liesbeth Vandenput of the Centre for Bone and Arthritis Research at the Sahlgrenska  
51  
52 420 Academy Institute of Medicine, University of Gothenburg, Mary Lou Biggs, Terena  
53  
54 421 Solomons, Jos Tournoy, Mark Divitni, Matthew Knuiman, John Acres, the staff and  
55  
56 422 participants of the ARIC study, the Busselton Population Medical Research Foundation for  
57  
58  
59  
60

1  
2  
3 423 access to the data, the Cardiovascular Health Study, the EMAS study, the Health In Men  
4  
5 424 Study, the MAILES study, the MrOS Study, for their important contributions.  
6  
7  
8  
9 425

10  
11 426 **Collaborators**

12  
13 427 The Androgens In Men Study: (1) Busselton Health Study: Busselton Population Medical  
14  
15 428 Research Institute (Inc.), Department of Pulmonary Physiology and Sleep Medicine, Sir  
16  
17 429 Charles Gairdner Hospital, Nedlands WA 6009, Australia (2) Health In Men Study (HIMS):  
18  
19 430 Western Australian Centre for Health and Ageing, University of Western Australia, Level 6  
20  
21 431 Medical Research Foundation Building, Royal Perth Hospital, Rear 50 Murray Street, Perth,  
22  
23 432 Western Australia 6000, Australia. (3) Men Androgen Inflammation Lifestyle Environment  
24  
25 433 and Stress (MAILES) study: Freemasons Foundation Centre for Men's Health, University of  
26  
27 434 Adelaide, 254 North Tce, Adelaide, Australia. (4) European Male Ageing Study (EMAS):  
28  
29 435 The University of Manchester, Stopford Building, Oxford Road, Manchester, M13 9PT, UK.  
30  
31 436 (5) Osteoporotic Fractures in Men (MrOS) Study Sweden: Department of Clinical Sciences  
32  
33 437 and Orthopedic Surgery, Lund University, Skåne University Hospital, Malmö, Sweden;  
34  
35 438 MrOS Study USA: California Pacific Medical Center Research Institute, San Francisco  
36  
37 439 Coordinating Center, 550 16th street, San Francisco, CA 94143. (6) Atherosclerosis Risk in  
38  
39 440 Communities study (ARIC): School of Public Health, U. of North Carolina, Suite 2013,  
40  
41 441 NCNB Plaza, 137 E. Franklin St, Chapel Hill, NC 27514. (7) Cardiovascular Health Study:  
42  
43 442 National Heart, Lung, and Blood Institute, Bethesda, MD. (8) The Framingham Heart Study,  
44  
45 443 Boston University School of Medicine, 72 E. Concord Street, B-601, Boston, MA 02118.  
46  
47  
48  
49  
50  
51  
52 444  
53  
54  
55  
56  
57  
58  
59  
60

1  
2  
3 445 **Authors' contributions**  
4

5 446 BBY, KM, LA, SB, ASD, AMM, CO, EO, TWO, DV, GAW, contributed to the study  
6  
7 447 concept and design. BBY, KM, RJM prepared the initial draft of the manuscript, including  
8  
9 448 literature review, list of variables and statistical methods. BBY, RJM, RJA, LA, CMB, SB,  
10  
11 449 PMC, DJC, ASD, LF, MK, SAM, AMM, DM, PEN, CO, ESO, TWO, MMS, TGT, DV,  
12  
13 450 GAW, FCWW, KM were involved in subsequent revisions to the protocol and manuscript,  
14  
15 451 and approved this submission.  
16  
17  
18

19 452

20  
21 453 **Funding**  
22

23 454 AIMS is funded by a Western Australian Health Translation Network (WAHTN) Medical  
24  
25 455 Research Future Fund Rapid Applied Translation Grant (2018). The ARIC study is funded by  
26  
27 456 has been funded in whole or in part with Federal funds from the National Heart, Lung, and  
28  
29 457 Blood Institute, National Institutes of Health, Department of Health and Human Services,  
30  
31 458 under Contract nos. (HHSN268201700001I, HHSN268201700002I, HHSN268201700003I,  
32  
33 459 HHSN268201700005I, HHSN268201700004I) and Dr. Ballantyne received NIH grant  
34  
35 460 support through R01HL134320 The 1994/1995 Busselton Health Survey was supported by  
36  
37 461 the Western Australian Health Promotion Foundation. The Cardiovascular Health Study was  
38  
39 462 supported by contracts HHSN268201200036C, HHSN268200800007C,  
40  
41 463 HHSN268201800001C, N01HC55222, N01HC85079, N01HC85080, N01HC85081,  
42  
43 464 N01HC85082, N01HC85083, N01HC85086, and grants U01HL080295 and U01HL130114  
44  
45 465 from the National Heart, Lung, and Blood Institute (NHLBI), with additional contribution  
46  
47 466 from the National Institute of Neurological Disorders and Stroke (NINDS). Additional  
48  
49 467 support was provided by R01AG023629 from the National Institute on Aging (NIA). A full  
50  
51 468 list of principal CHS investigators and institutions can be found at CHS-NHLBI.org. The  
52  
53 469 EMAS study is funded by The Commission of the European Communities Fifth Framework  
54  
55  
56  
57  
58  
59  
60



1  
2  
3 470 Programme “Quality of Life and Management of Living Resources” Grant No. QLK6-CT-  
4  
5 471 2001-00 258 and supported by Arthritis Research UK. The Framingham Heart Study of the  
6  
7 472 National Heart Lung and Blood Institute of the National Institutes of Health and Boston  
8  
9 473 University School of Medicine has been funded in whole or in part with Federal funds from  
10  
11 474 the National Heart, Lung, and Blood Institute, National Institutes of Health, Department of  
12  
13 475 Health and Human Services, under Contract No. 75N92019D00031. The HIMS study is  
14  
15 476 funded by project grants from the National Health and Medical Research Council of  
16  
17 477 Australia. The MAILES study is funded by a project grant from the National Health and  
18  
19 478 Medical Research Council of Australia (627227). The MrOS Sweden study is funded by The  
20  
21 479 Swedish Research Council and Swedish ALF funding. The Osteoporotic Fractures in Men  
22  
23 480 (MrOS) Study is supported by National Institutes of Health funding. The following institutes  
24  
25 481 provide support: the National Institute on Aging (NIA), the National Institute of Arthritis and  
26  
27 482 Musculoskeletal and Skin Diseases (NIAMS), the National Center for Advancing  
28  
29 483 Translational Sciences (NCATS), and NIH Roadmap for Medical Research under the  
30  
31 484 following grant numbers: U01 AG027810, U01 AG042124, U01 AG042139, U01  
32  
33 485 AG042140, U01 AG042143, U01 AG042145, U01 AG042168, U01 AR066160, and UL1  
34  
35 486 TR000128.  
36  
37  
38  
39  
40  
41  
42

43 **Disclaimer**  
44

45 489 The funders played no role in the study design, data collection, data analysis or interpretation,  
46  
47 490 writing of the manuscript or the decision to submit the article for publication. All authors are  
48  
49 491 accountable for all aspects of the work in ensuring that questions related to the accuracy or  
50  
51 492 integrity of any part of the work are appropriately investigated and resolved. The content is  
52  
53 493 solely the responsibility of the authors and does not necessarily represent the official views of  
54  
55 494 the National Institutes of Health.  
56  
57  
58  
59  
60

1  
2  
3 496 **Competing interests**  
4

5 497 None declared.  
6  
7

8 498  
9

10 499 **Patient consent**  
11

12 500 Each of the component studies have addressed participant/patient consent permissions; please  
13  
14 501 refer to respective component studies for details.[79-86]  
15  
16

17 502  
18

19 503 **Ethics approval**  
20

21 504 The AIMS study has been assessed as exempt from ethics review by the Human Ethics office  
22  
23 505 at the University of Western Australia (file reference number RA/4/20/5014). Each of the  
24  
25 506 component studies had obtained ethics approvals; please refer to respective component  
26  
27 507 studies for details.[79-86]  
28  
29

30 508  
31  
32

33 509 **Provenance and peer review**  
34

35 510 Not commissioned; externally peer reviewed.  
36  
37

38 511  
39

40 512  
41  
42  
43  
44  
45  
46  
47  
48  
49  
50  
51  
52  
53  
54  
55  
56  
57  
58  
59  
60

513 **References cited**

- 514 1. Handelsman DJ, Yeap BB, Flicker L, et al. Age-specific population centiles for androgen status in  
515 men. *Eur J Endocrinol* 2015;173(6):809-17. doi: 10.1530/EJE-15-0380
- 516 2. Hsu B, Cumming RG, Hirani V, et al. Temporal trend in androgen status and androgen-sensitive  
517 outcomes in older men. *J Clin Endocrinol Metab* 2016;101(4):1836-46. doi: 10.1210/jc.2015-3810
- 518 3. Shi Z, Araujo AB, Martin S, et al. Longitudinal changes in testosterone over five years in  
519 community-dwelling men. *J Clin Endocrinol Metab* 2013;98(8):3289-97. doi: 10.1210/jc.2012-  
520 3842
- 521 4. Yeap BB, Manning L, Chubb SAP, et al. Progressive impairment of testicular endocrine function in  
522 ageing men: testosterone and dihydrotestosterone decrease, and luteinizing hormone increases,  
523 in men transitioning from the 8th to 9th decades of life. *Clin Endocrinol* 2018;88:88-95. doi:  
524 10.1111/cen.13484
- 525 5. Sikaris K, McLachlan RI, Kazlauskas R, et al. Reproductive hormone reference intervals for healthy  
526 fertile young men: evaluation of automated platform assays. *J Clin Endocrinol Metab*  
527 2005;90(11):5928-36. doi: 10.1210/jc.2005-0962
- 528 6. Yeap BB, Alfonso H, Chubb SAP, et al. Reference ranges and determinants of testosterone,  
529 dihydrotestosterone, and estradiol levels measured using liquid chromatography-tandem mass  
530 spectrometry in a population-based cohort of older men. *J Clin Endocrinol Metab*  
531 2012;97(11):4030-39. doi: 10.1210/jc.2012-2265
- 532 7. Handelsman DJ, Wartofsky L. Requirement for Mass Spectrometry Sex Steroid Assays in the  
533 Journal of Clinical Endocrinology and Metabolism. *J Clin Endocrinol Metab* 2013;98:3971-73. doi:  
534 10.1210/jc.2013-3375
- 535 8. Hsu B, Cumming RG, Naganathan V, et al. Temporal Changes in Androgens and Estrogens Are  
536 Associated With All-Cause and Cause-Specific Mortality in Older Men. *J Clin Endocrinol Metab*  
537 2016;101:2201-10. doi: 10.1210/jc.2016-1025
- 538 9. Ohlsson C, Barrett-Connor E, Bhasin S, et al. High Serum Testosterone Is Associated With Reduced  
539 Risk of Cardiovascular Events in Elderly Men. *J Am Coll Cardiol* 2011;58:1674-81. doi:  
540 10.1016/j.jacc.2011.07.019
- 541 10. Pye SR, Huhtaniemi IT, Finn JD, et al. Late-Onset Hypogonadism and Mortality in Aging Men. *J*  
542 *Clin Endocrinol Metab* 2014;99:1357-66. doi: 10.1210/jc.2013-2052
- 543 11. Tivesten A, Mellstrom D, Jutberger H, et al. Low serum testosterone and high serum estradiol  
544 associate with lower extremity peripheral arterial disease in elderly men. *J Am Coll Cardiol*  
545 2007;50:1070-76. doi: 10.1016/j.jacc.2007.04.088
- 546 12. Tivesten A, Vandenput L, Labrie F, et al. Low serum testosterone and estradiol predict mortality  
547 in elderly men. *J Clin Endocrinol Metab* 2009;94:2482-88. doi: 10.1210/jc.2008-2650
- 548 13. Yeap BB, Alfonso H, Chubb SAP, et al. In older men, higher plasma testosterone or  
549 dihydrotestosterone is an independent predictor for reduced incidence of stroke but not  
550 myocardial infarction. *J Clin Endocrinol Metab* 2014;99(12):4565-73. doi: 10.1210/jc.2014-2664
- 551 14. Yeap BB, Hyde Z, Almeida OP, et al. Lower testosterone levels predict incident stroke and  
552 transient ischemic attack in older men. *J Clin Endocrinol Metab* 2009;94(7):2353-59. doi:  
553 10.1210/jc.2008-2416
- 554 15. Yeap BB, Knuiman MW, Divitni ML, et al. Differential associations of testosterone,  
555 dihydrotestosterone and oestradiol with physical, metabolic and health-related factors in  
556 community-dwelling men aged 17–97 years from the Busselton Health Survey. *Clin Endocrinol*  
557 2014;81:100-08.
- 558 16. Chan YX, Knuiman MW, Hung J, et al. Neutral associations of testosterone, dihydrotestosterone  
559 and estradiol with fatal and non-fatal cardiovascular events, and mortality in men aged 17–97  
560 years. *Clin Endocrinol* 2016;85:575-82. doi: 10.1111/cen.13089

17. Shores MM, Arnold AM, Biggs ML, et al. Testosterone and dihydrotestosterone and incident ischaemic stroke in men in the Cardiovascular Health Study. *Clin Endocrinol* 2014;81:746-53. doi: 10.1111/cen.12452
18. Shores MM, Biggs ML, Arnold AM, et al. Testosterone, Dihydrotestosterone, and Incident Cardiovascular Disease and Mortality in the Cardiovascular Health Study. *J Clin Endocrinol Metab* 2014;99:2061-68. doi: 10.1210/jc.2013-3576
19. Srinath R, Golden SH, Carson KA, et al. Endogenous Testosterone and its Relationship to Preclinical and Clinical Measures of Cardiovascular Disease in the Atherosclerosis Risk in Communities Study. *J Clin Endocrinol Metab* 2015;100:1602-08. doi: 10.1210/jc.2014-3934
20. Srinath R, Gottesman RF, Golden SH, et al. Association Between Endogenous Testosterone and Cerebrovascular Disease in the ARIC Study (Atherosclerosis Risk in Communities). *Stroke* 2016;47:2682-88. doi: 10.1161/STROKEAHA.116.014088
21. Chan YX, Knuiman MW, Divitni ML, et al. Lower circulating androgens are associated with overall cancer risk and prostate cancer risk in men aged 25-84 years from the Busselton Health Study. *Horm Cancer* 2018;9:391-98. doi: 10.1007/s12672-018-0346-5
22. Daniels NA, Nielson CM, Hoffman AR, et al. Sex hormones and the risk of incident prostate cancer. *Urology* 2010;76:1034-14. doi: 10.1016/j.urology.2010.01.086
23. Ford AH, Yeap BB, Flicker L, et al. Sex hormones and incident dementia in older men: The health in men study. *Psychoneuroendocrinol* 2018;98:139-47. doi: 10.1016/j.psyneuen.2018.08.013
24. Ford AH, Yeap BB, Flicker L, et al. Prospective longitudinal study of testosterone and incident depression in older men: The Health In Men Study. *Psychoneuroendocrinology* 2016;64:57-65. doi: 10.1016/j.psyneuen.2015.11.012
25. LeBlanc ES, Wang PY, Janowsky JS, et al. Association between sex steroids and cognition in elderly men. *Clin Endocrinol* 2010;72:393-403. doi: 10.1111/j.1365-2265.2009.03692.x
26. Yeap BB, Wu FCW. Clinical practice update on testosterone therapy for male hypogonadism: contrasting perspectives to optimize care. *Clin Endocrinol* 2019;90:56-65. doi: 10.1111/cen.13888
27. Yeap BB, Grossmann M, McLachlan RI, et al. Endocrine Society of Australia position statement on male hypogonadism (part 2): treatment and therapeutic considerations. *Med J Aust* 2016;205:228-31. doi: 10.5694/mja16.00448
28. Yeap BB, Grossmann M, McLachlan RI, et al. Endocrine Society of Australia position statement on male hypogonadism (part 1): assessment and indications for testosterone therapy. *Med J Aust* 2016;205:173-78. doi: 10.5694/mja16.00393
29. Bhasin S, Brito JP, Cunningham GR, et al. Testosterone therapy in men with hypogonadism: an Endocrine Society\* Clinical Practice Guideline. *J Clin Endocrinol Metab* 2018;103(5):1715-44. doi: 10.1210/jc.2018-00229
30. Resnick SM, Matsumoto AM, Stephens-Shields AJ, et al. Testosterone treatment and cognitive function in older men with low testosterone and age-associated memory impairment. *JAMA* 2017;317:717-27. doi: 10.1001/jama.2016.21044
31. Roy CN, Snyder PJ, Stephens-Shields AJ, et al. Association of testosterone levels with anemia in older men: A controlled clinical trial. *JAMA Intern Med* 2017;177:480-90. doi: 10.1001/jamainternmed.2016.9540
32. Snyder PJ, Bhasin S, Cunningham GR, et al. Effects of testosterone treatment in older men. *N Engl J Med* 2016;374:611-24. doi: 10.1056/NEJMoa1506119
33. Snyder PJ, Bhasin S, Cunningham GR, et al. Lessons from the testosterone trials. *Endocr Rev* 2018;39:369-86. doi: 10.1210/er.2017-00234
34. Snyder PJ, Kopperdahl DL, Stephens-Shields AJ, et al. Effect of testosterone treatment on volumetric bone density and strength in older men with low testosterone: A controlled clinical trial. *JAMA Intern Med* 2017;177:471-79. doi: 10.1001/jamainternmed.2016.9539
35. Budoff M, Ellenberg SS, Lewis CE, et al. Testosterone treatment and coronary artery plaque volume in older men with low testosterone. *JAMA* 2017;317:708-16. doi: 10.1001/jama.2016.21043

- 1  
2  
3 612 36. Yeap BB, Page ST, Grossmann M. Testosterone treatment in older men: clinical implications and  
4 613 unresolved questions from the Testosterone Trials. *Lancet Diabetes Endocrinol* 2018;6:659-72.  
5 614 doi: 10.1016/S2213-8587(17)30416-3  
6 615  
7 616 37. Riley RD, Lambert PC, Abo-Zaid G. Meta-analysis of individual participant data: rationale,  
8 617 conduct, and reporting. *BMJ* 2010; 340.  
9 618  
10 619 38. Stewart LA, Parmar MKB. Meta-analysis of the literature or of individual patient data: is there a  
11 620 difference? *Lancet* 1993;341:418-22.  
12 621  
13 622 39. Burke DL, Ensor J, Riley RD. Meta-analysis using individual participant data: one-stage and two-  
14 623 stage approaches, and why they may differ. *Statist Med* 2016;36:855-75. doi: 10.1002/sim.7141  
15 624  
16 625 40. Debray TP, Moons KG, Abo-Zaid GM, et al. Individual participant data meta-analysis for a binary  
17 626 outcome: one-stage or two-stage? *PloS One* 2013; 8.  
18 627  
19 628 41. Munn Z, Stern C, Aromataris E, et al. What kind of systematic review should I conduct? A  
20 629 proposed typology and guidance for systematic reviewers in the medical and health sciences.  
21 630 *BMC Med Res Methodol* 2018; 18.  
22 631  
23 632 42. Stewart LA, Clarke M, Rovers M, et al. Preferred reporting items for a systematic review and  
24 633 meta-analysis of individual participant data: the PRISMA-IPD statement. *JAMA*  
25 634 2015;313(16):1657-65. doi: 10.1001/jama.2015.3656  
26 635  
27 636 43. Stroup DF, Berlin JA, Morton SC, et al. Meta-analysis of observational studies in epidemiology.  
28 637 *JAMA* 2000;283:2008-12.  
29 638  
30 639 44. Higgins JPT, Altman DG, Sterne JAC. Chapter 8: Assessing risk of bias in included studies In:  
31 640 Higgins JPT, Altman DG, Sterne JAC, eds. *Cochrane Handbook for Systematic Reviews of*  
32 641 *Interventions* version 520. [www.training.cochrane.org/handbook](http://www.training.cochrane.org/handbook): The Cochrane Collaboration,  
33 642 2017.  
34 643  
35 644 45. Liberati A, Altman DG, Tetzlaff J, et al. The PRISMA statement for reporting systematic reviews  
36 645 and meta-analyses of studies that evaluate health care interventions: explanation and  
37 646 elaboration. *PLOS Med* 2009; 6(7).  
38 647  
39 648 46. Deeks JJ, Higgins JPT, Altman DG. Chapter 9: Analysing data and undertaking meta-analyses. In:  
40 649 Higgins JPT, Churchill R, Chandler J, et al., eds. *Cochrane Handbook for Systematic Reviews of*  
41 650 *Interventions* version 520. [www.training.cochrane.org/handbook](http://www.training.cochrane.org/handbook): The Cochrane Collaboration,  
42 651 2017.  
43 652  
44 653 47. van Buuren S. *Flexible Imputation of Missing Data*, Second Edition. Milton: CRC Press LLC 2018.  
45 654  
46 655 48. Graham J. Missing data analysis: making it work in the real world. *Annu Rev Psychol* 2009;60:549-  
47 656 76. doi: 10.1146/annurev.psych.58.110405.085530  
48 657  
49 658 49. van Buuren S, Brand J, Groothuis-Oudshoorn K, et al. Fully conditional specification in multivariate  
50 659 imputation. *J Stat Comput Simul* 2006;76:1049-64. doi: 10.1080/10629360600810434  
51 660  
52 661 50. Kenward M, Carpenter J. *Multiple imputation of quantitative data. Multiple Imputation and Its*  
53 662 *Application*. Chichester: Wiley 2013:77-89.  
54 663  
55 664 51. He Y, Zaslavsky A. Diagnosing imputation models by applying target analyses to posterior  
56 665 replicates of completed data. *Statist Med* 2010;31:1-18. doi: 10.1002/sim.4413  
57 666  
58 667 52. Rubin DB. *Multiple imputation for nonresponse in surveys*. New York: Wiley 1987.  
59 668  
60 669 53. Hukkelhoven CWPM, Steyerberg EW, Rampen AJJ, et al. Patient age and outcome following  
61 670 severe traumatic brain injury: an analysis of 5600 patients. *J Neurosurg* 2003;99:666-73.  
62 671  
63 672 54. Riley RD, Simmonds MC, Look MP. Evidence synthesis combining individual patient data and  
64 673 aggregate data: a systematic review identified current practice and possible methods. *J Clin*  
65 674 *Epidemiol* 2007;60:431-39. doi: 10.1016/j.jclinepi.2006.09.009  
66 675  
67 676 55. Steyerberg EW, Kievit J, de Mol Van Otterloo JC. Perioperative mortality of elective abdominal  
68 677 aortic aneurysm surgery. A clinical prediction rule based on literature and individual patient data.  
69 678 *Arch Intern Med* 1995;155:1998-2004.  
70 679  
71 680 56. Ly LP, Sartorius G, Hull L, et al. Accuracy of calculated free testosterone formulae in men. *Clin*  
72 681 *Endocrinol* 2010;73:382-88. doi: 10.1111/j.1365-2265.2010.03804.x

- 1  
2  
3 662 57. Borenstein M, Hedges LV, Higgins JPT, et al. Introduction to Meta-Analysis. West Sussex: John  
4 663 Wiley & Sons Ltd 2009.
- 5 664 58. Fisher R. Statistical methods for research workers (2nd ed.). New York: Hafner 1928.
- 6 665 59. Pearson K. On a correction needful in the case of the correlation ratio. *Biometrika* 1911;8:254-56.
- 7 666 60. Keiding N, Anderson PK, Klein JP. The role of frailty models and accelerated failure time models  
8 667 in describing heterogeneity due to omitted covariates. *Statist Med* 1997;16:215-24.
- 9 668 61. Vaupel JW, Manton KG, Stallard E. The impact of heterogeneity in individual frailty on the  
10 669 dynamics of mortality. *Demography* 1979;16:439-54.
- 11 670 62. Yashin A, Vaupel J, Iachine I. Correlated individual frailty: An advantageous approach to survival  
12 671 analysis of bivariate data. *Math Popul Stud* 1995;5:145-59.
- 13 672 63. Ahmed I, Sutton AJ, Riley RD. Assessment of publication bias, selection bias, and unavailable data  
14 673 in meta-analyses using individual participant data: a database survey. *BMJ* 2012; 344.
- 15 674 64. Shamseer L, Moher D, Clarke M, et al. Preferred reporting items for systematic review and meta-  
16 675 analysis protocols (PRISMA-P) 2015: elaboration and explanation. *BMJ* 2015; 350.
- 17 676 65. Sterne JAC, Sutton AJ, Ioannidis JPA, et al. Recommendations for examining an interpreting  
18 677 funnel plot asymmetry in meta-analyses of randomised controlled trials. *BMJ* 2011; 342.
- 19 678 66. Araujo AB, Dixon JM, Suarez EA, et al. Endogenous Testosterone and Mortality in Men: A  
20 679 Systematic Review and Meta-Analysis. *J Clin Endocrinol Metab* 2011;96:3007-19. doi:  
21 680 10.1210/jc.2011-1137
- 22 681 67. Atlantis E, Fahey P, Cochrane B, et al. Endogenous testosterone level and testosterone  
23 682 supplementation therapy in chronic obstructive pulmonary disease (COPD): a systematic review  
24 683 and meta-analysis. *BMJ Open* 2013; 3.
- 25 684 68. Boyle P, Koehlin A, Bota M, et al. Endogenous and exogenous testosterone and the risk of  
26 685 prostate cancer and increased prostatespecific antigen (PSA) level: a meta-analysis. *BJU Int*  
27 686 2016;118:731-41. doi: 10.1111/bju.13417
- 28 687 69. Brand JS, Rovers MM, Yeap BB, et al. Testosterone, Sex Hormone-Binding Globulin and the  
29 688 Metabolic Syndrome in Men: An Individual Participant Data Meta-Analysis of Observational  
30 689 Studies. *PLoS One* 2014; 9.
- 31 690 70. Brand JS, van der Tweel I, Grobbee DE, et al. Testosterone, sex hormone-binding globulin and the  
32 691 metabolic syndrome: a systematic review and meta-analysis of observational studies. *Int J*  
33 692 *Epidemiol* 2010;40:189-207. doi: 10.1093/ije/dyq158
- 34 693 71. Claps M, Petrelli F, Caffo O, et al. Testosterone Levels and Prostate Cancer Prognosis: Systematic  
35 694 Review and Meta-analysis. *Clin Genitourin Cancer* 2018;16:165-75. doi:  
36 695 10.1016/j.clgc.2018.01.005
- 37 696 72. Corona G, Monami M, Rastrelli G, et al. Testosterone and Metabolic Syndrome: A Meta-Analysis  
38 697 Study. *J Sex Med* 2011;8:272-83. doi: 10.1111/j.1743-6109.2010.01991.x
- 39 698 73. Haddad RM, Kennedy CC, Caples SM, et al. Testosterone and cardiovascular risk in men: A  
40 699 systematic review and meta-analysis of randomised placebo-controlled trials. *Mayo Clin Proc*  
41 700 2007;82:29-39.
- 42 701 74. Holmegard HN, Nordestgaard BG, Jensen GB, et al. Sex hormones and ischemic stroke: a  
43 702 prospective cohort study and meta-analyses. *J Clin Endocrinol Metab* 2016;101:69-78. doi:  
44 703 10.1210/jc.2015-2687
- 45 704 75. Isidori AM, Giannetta E, Gianfrilli D, et al. Effects of testosterone on sexual function in men:  
46 705 results of a meta-analysis. *Clin Endocrinol* 2005;63:381-94. doi: 10.1111/j.1365-  
47 706 2265.2005.02350.x
- 48 707 76. Lv W, Du N, Liu Y, et al. Low Testosterone Level and Risk of Alzheimer's Disease in the Elderly  
49 708 Men: a Systematic Review and Meta-Analysis. *Mol Neurobiol* 2016;53:2679-84. doi:  
50 709 10.1007/s12035-015-9315-y
- 51 710 77. Ruige JB, Mahmoud AM, Bacquer DD, et al. Endogenous testosterone and cardiovascular disease  
52 711 in healthy men: a meta-analysis. *Heart* 2010;97:870-75. doi: 10.1136/hrt.2010.210757
- 53 712 78. Gordis L. Epidemiology. 4th ed. Philadelphia: Saunders 2009.

- 1  
2  
3 713 79. Fried LP, Borhani NO, Enright P, et al. The Cardiovascular Health Study: Design and Rationale.  
4 714 *Ann Epidemiol* 1991;1:263-76.  
5 715 80. Grant JF, Martin SA, Taylor AW, et al. Cohort Profile: The Men Androgen Inflammation Lifestyle  
6 716 Environment and Stress (MAILES) Study. *Int J Epidemiol* 2014;43:1040-53. doi: 10.1093/ije/dyt064  
7 717 81. Kannel WB, Feinleib M, McNamara PM, et al. An investigation of coronary heart disease in  
8 718 families: The Framingham Offspring Study. *Am J Epidemiol* 1979;110:281-90.  
9 719 82. Knuiman MW, Jamrozik K, Welborn TA, et al. Age and secular trends in risk factors for  
10 720 cardiovascular disease in Busselton. *Aust J Public Health* 1995;19:375-82.  
11 721 83. Lee DM, O'Neill TW, Pye SR, et al. The European Male Ageing Study (EMAS): design, methods and  
12 722 recruitment. *Int J Androl* 2008;32:11-24. doi: 10.1111/j.1365-2605.2008.00879.x  
13 723 84. Norman PE, Flicker L, Almeida OP, et al. Cohort Profile: The Health In Men Study (HIMS). *Int J*  
14 724 *Epidemiol* 2009;38:48-52. doi: 10.1093/ije/dyn041  
15 725 85. Orwoll E, Blank JB, Barrett-Connor E, et al. Design and baseline characteristics of the  
16 726 osteoporotic fractures in men (MrOS) study — A large observational study of the determinants of  
17 727 fracture in older men. *Contemp Clin Trials* 2005;26:569-85. doi: 10.1016/j.cct.2005.05.006  
18 728 86. The ARIC Investigators. The Atherosclerosis Risk In Communities (ARIC) study: design and  
19 729 objectives. *Am J Epidemiol* 1989;129:687-702.  
20  
21  
22  
23 730  
24  
25  
26  
27  
28  
29  
30  
31  
32  
33  
34  
35  
36  
37  
38  
39  
40  
41  
42  
43  
44  
45  
46  
47  
48  
49  
50  
51  
52  
53  
54  
55  
56  
57  
58  
59  
60

## 731 TABLES

732 Table 1. Variables planned to be included in IPD meta-analysis modelling.¶¶

| Type                                  | Analysis 1                 | Analysis 2                            | Analysis 3                   | Analysis 4              |
|---------------------------------------|----------------------------|---------------------------------------|------------------------------|-------------------------|
| <b>Outcomes / DV</b>                  | Androgen concentration§    | Incident CVD*                         | Incident deaths (cancer*)    | Incident dementia       |
|                                       |                            | Incident deaths (CVD*)                | Incident cancer* (diagnoses) | Baseline cognition      |
|                                       |                            | Incident deaths (all-cause)           |                              | Change in cognition     |
| <b>Focal predictor</b>                | -                          | Androgen concentration§               | Androgen concentration§      | Androgen concentration§ |
| <b>Covariates / IV</b>                |                            |                                       |                              |                         |
| <b>Demographic</b>                    | age                        | age                                   | age                          | age                     |
|                                       | education level            | education level                       | education level              | education level         |
|                                       | ethnicity                  | ethnicity                             | ethnicity                    | ethnicity               |
|                                       | marital status             | marital status                        | marital status               | marital status          |
|                                       | site                       | site                                  | site                         | site                    |
| <b>Risk factors and comorbidities</b> | alcohol consumption        | alcohol consumption                   | alcohol consumption          | alcohol consumption     |
|                                       | BMI, waist                 | BMI, waist                            | BMI, waist                   | BMI, waist              |
|                                       | physical activity          | physical activity                     | physical activity            | physical activity       |
|                                       | smoking status             | smoking status                        | smoking status               | smoking status          |
|                                       | BP, hypertension           | BP, hypertension                      | BP, hypertension             | BP, hypertension        |
|                                       | general health             | general health<br>atrial fibrillation | general health               | general health          |
|                                       | prevalent CVD              | prevalent CVD                         |                              |                         |
|                                       | prevalent cancer*          |                                       | prevalent cancer*            |                         |
|                                       | prevalent dementia         |                                       |                              | prevalent dementia      |
|                                       | baseline cognition         |                                       |                              |                         |
|                                       | COPD                       | COPD                                  |                              |                         |
|                                       | diabetes                   | diabetes                              | diabetes                     | diabetes                |
|                                       | cholesterol, LDL, HDL      | cholesterol, LDL, HDL                 |                              |                         |
|                                       | creatinine level           | creatinine level                      |                              |                         |
|                                       | lipid lowering medications | lipid lowering medications            |                              |                         |
|                                       | anxiety                    |                                       |                              | anxiety                 |
|                                       | depression                 |                                       |                              | depression              |
|                                       | psychotropic drug use      |                                       |                              | psychotropic drug use   |

733 **Abbreviations:** BMI = body mass index; BP= blood pressure; CVD = Cardiovascular  
734 Disease; DV = dependent variable; COPD = Chronic Obstructive Pulmonary Disease;  
735 IV = independent variables.

736 ¶¶ = Black font: highly desirable; Green font: only if available.



1  
2  
3 737 § = Androgens: total testosterone, dihydrotestosterone, estradiol, luteinising hormone, sex  
4 738 hormone binding globulin.  
5 739 \* = Subgroup analyses are also planned. For CVD outcomes: Heart Failure, Myocardial  
6 740 Infarction, Stroke. For cancer outcomes: colorectal cancer, lung cancer, prostate  
7 741 cancer.  
8  
9  
10  
11  
12  
13  
14  
15  
16  
17  
18  
19  
20  
21  
22  
23  
24  
25  
26  
27  
28  
29  
30  
31  
32  
33  
34  
35  
36  
37  
38  
39  
40  
41  
42  
43  
44  
45  
46  
47  
48  
49  
50  
51  
52  
53  
54  
55  
56  
57  
58  
59  
60

For peer review only

**Supplementary Table S1.** Example search strategy for systematic review: AIMS study.

The following is the search strategy for MEDLINE. The search strategy for EMBASE, OpenGrey, and Mednar attempts to replicate this as closely as possible, and will be subsequently reported upon completion of the Systematic Review.

1. Testosterone/ or Androgens/
2. (testosterone or androgen\* or sex hormone\* or sex steroid\*).ti.
3. (testosterone or androgen\*).ab.
4. cardiovascular diseases/ or heart diseases/ or heart failure/ or vascular diseases/ or stroke/ or myocardial infarction/ or coronary disease/ or cerebrovascular disorders/
5. (cardiovascular or stroke or myocardial infarction or heart failure).ti.
6. neoplasms/ or colorectal neoplasms/ or lung neoplasms/ or prostatic neoplasms/
7. cancer.ti.
8. mortality/ or mortality.ti.
9. dementia/ or cognition/ or dementia.ti. or cognit\*.ti.
10. Aging/psychology or Neuropsychological Tests/
11. 1 or 2 or 3
12. 4 or 5 or 6 or 7 or 8 or 9 or 10
13. 11 and 12
14. longitudinal studies/ or prospective studies/ or follow-up studies/ or cohort studies/
15. (prospective or follow-up or cohort study or longitudinal study).ti,ab.
16. 14 or 15
17. 13 and 16
18. (exogenous or replacement or therapy or hormone treatment).ti.
19. Hormone Replacement Therapy/
20. 18 or 19
21. 17 not 20
22. limit 21 to humans
23. limit 22 to english language
24. limit 23 to (adaptive clinical trial or address or autobiography or bibliography or biography or case reports or clinical trial, all or clinical trial, phase i or clinical trial, phase ii or clinical trial, phase iii or clinical trial, phase iv or clinical trial, veterinary or clinical trials, veterinary as topic or clinical trial protocol or clinical trial or comment or controlled clinical trial or dictionary or editorial or lecture or legislation or meta analysis or practice guideline or pragmatic clinical trial or published erratum or randomized controlled trial or retracted publication or "retraction of publication" or "review" or "scientific integrity review" or "systematic review")
25. Retrospective Studies/ or Case-Control Studies/ or (retrospective analysis or case-control).ti.
26. 24 or 25
27. 23 not 26

Notes:

Terms with a trailing "/" are MeSH terms and those with a trailing "\*" are truncated search strings. This search strategy is included with the PROSPERO registration for the AIMS

1  
2  
3 project (Registration No. CRD42019139668). Beforehand, a search of PROSPERO was  
4 conducted for another suitable strategy but none were found. However, the above strategy is  
5 based upon one that has been used for a similar study.<sup>1</sup>  
6  
7

### 8 **References cited**

9  
10 1. Holmegard HN, Nordestgaard BG, Jensen GB, Tybjaerg-Hansen A, Benn M. Sex  
11 hormones and ischemic stroke: a prospective cohort study and meta-analyses. *J Clin*  
12 *Endocrinol Metab.* 2016;101:69-78.  
13  
14  
15  
16  
17  
18  
19  
20  
21  
22  
23  
24  
25  
26  
27  
28  
29  
30  
31  
32  
33  
34  
35  
36  
37  
38  
39  
40  
41  
42  
43  
44  
45  
46  
47  
48  
49  
50  
51  
52  
53  
54  
55  
56  
57  
58  
59  
60

For peer review only

**PRISMA-IPD Checklist of items to include when reporting a systematic review and meta-analysis of individual participant data (IPD):  
the Androgens In Men Study (AIMS).**

| PRISMA-IPD Section/topic  | Item No | Checklist item                                                                                                                                                                                                                                                                                                                                                                                                                                                                                                          | Reported on page |
|---------------------------|---------|-------------------------------------------------------------------------------------------------------------------------------------------------------------------------------------------------------------------------------------------------------------------------------------------------------------------------------------------------------------------------------------------------------------------------------------------------------------------------------------------------------------------------|------------------|
| <b>Title</b>              |         |                                                                                                                                                                                                                                                                                                                                                                                                                                                                                                                         |                  |
| Title                     | 1       | Identify the report as a systematic review and meta-analysis of individual participant data.                                                                                                                                                                                                                                                                                                                                                                                                                            | 1                |
| <b>Abstract</b>           |         |                                                                                                                                                                                                                                                                                                                                                                                                                                                                                                                         |                  |
| Structured summary        | 2       | Provide a structured summary including as applicable:                                                                                                                                                                                                                                                                                                                                                                                                                                                                   | 4-5              |
|                           |         | <b>Background:</b> state research question and main objectives, with information on participants, interventions, comparators and outcomes.                                                                                                                                                                                                                                                                                                                                                                              |                  |
|                           |         | <b>Methods:</b> report eligibility criteria; data sources including dates of last bibliographic search or elicitation, noting that IPD were sought; methods of assessing risk of bias.                                                                                                                                                                                                                                                                                                                                  |                  |
|                           |         | <b>Results:</b> provide number and type of studies and participants identified and number (%) obtained; summary effect estimates for main outcomes (benefits and harms) with confidence intervals and measures of statistical heterogeneity. Describe the direction and size of summary effects in terms meaningful to those who would put findings into practice.                                                                                                                                                      |                  |
|                           |         | <b>Discussion:</b> state main strengths and limitations of the evidence, general interpretation of the results and any important implications.                                                                                                                                                                                                                                                                                                                                                                          |                  |
|                           |         | <b>Other:</b> report primary funding source, registration number and registry name for the systematic review and IPD meta-analysis.                                                                                                                                                                                                                                                                                                                                                                                     |                  |
| <b>Introduction</b>       |         |                                                                                                                                                                                                                                                                                                                                                                                                                                                                                                                         |                  |
| Rationale                 | 3       | Describe the rationale for the review in the context of what is already known.                                                                                                                                                                                                                                                                                                                                                                                                                                          | 6-7              |
| Objectives                | 4       | Provide an explicit statement of the questions being addressed with reference, as applicable, to participants, interventions, comparisons, outcomes and study design (PICOS). Include any hypotheses that relate to particular types of participant-level subgroups.                                                                                                                                                                                                                                                    | 8                |
| <b>Methods</b>            |         |                                                                                                                                                                                                                                                                                                                                                                                                                                                                                                                         |                  |
| Protocol and registration | 5       | Indicate if a protocol exists and where it can be accessed. If available, provide registration information including registration number and registry name. Provide publication details, if applicable.                                                                                                                                                                                                                                                                                                                 | 5                |
| Eligibility criteria      | 6       | Specify inclusion and exclusion criteria including those relating to participants, interventions, comparisons, outcomes, study design and characteristics (e.g. years when conducted, required minimum follow-up). Note whether these were applied at the study or individual level i.e. whether eligible participants were included (and ineligible participants excluded) from a study that included a wider population than specified by the review inclusion criteria. The rationale for criteria should be stated. | 9                |

| PRISMA-IPD Section/topic                       | Item No | Checklist item                                                                                                                                                                                                                                                                                                                                                                                                                          | Reported on page |
|------------------------------------------------|---------|-----------------------------------------------------------------------------------------------------------------------------------------------------------------------------------------------------------------------------------------------------------------------------------------------------------------------------------------------------------------------------------------------------------------------------------------|------------------|
| <b>Title</b>                                   |         |                                                                                                                                                                                                                                                                                                                                                                                                                                         |                  |
| Identifying studies - information sources      | 7       | Describe all methods of identifying published and unpublished studies including, as applicable: which bibliographic databases were searched with dates of coverage; details of any hand searching including of conference proceedings; use of study registers and agency or company databases; contact with the original research team and experts in the field; open adverts and surveys. Give the date of last search or elicitation. | 9                |
| Identifying studies - search                   | 8       | Present the full electronic search strategy for at least one database, including any limits used, such that it could be repeated.                                                                                                                                                                                                                                                                                                       | 9, Suppl. Data   |
| Study selection processes                      | 9       | State the process for determining which studies were eligible for inclusion.                                                                                                                                                                                                                                                                                                                                                            | 9                |
| Data collection processes                      | 10      | Describe how IPD were requested, collected and managed, including any processes for querying and confirming data with investigators. If IPD were not sought from any eligible study, the reason for this should be stated (for each such study).                                                                                                                                                                                        | 10-12            |
|                                                |         | If applicable, describe how any studies for which IPD were not available were dealt with. This should include whether, how and what aggregate data were sought or extracted from study reports and publications (such as extracting data independently in duplicate) and any processes for obtaining and confirming these data with investigators.                                                                                      |                  |
| Data items                                     | 11      | Describe how the information and variables to be collected were chosen. List and define all study level and participant level data that were sought, including baseline and follow-up information. If applicable, describe methods of standardising or translating variables within the IPD datasets to ensure common scales or measurements across studies.                                                                            | 12-13            |
| IPD integrity                                  | A1      | Describe what aspects of IPD were subject to data checking (such as sequence generation, data consistency and completeness, baseline imbalance) and how this was done.                                                                                                                                                                                                                                                                  | 10-11            |
| Risk of bias assessment in individual studies. | 12      | Describe methods used to assess risk of bias in the individual studies and whether this was applied separately for each outcome. If applicable, describe how findings of IPD checking were used to inform the assessment. Report if and how risk of bias assessment was used in any data synthesis.                                                                                                                                     | 10-11,16-17      |
| Specification of outcomes and effect measures  | 13      | State all treatment comparisons of interests. State all outcomes addressed and define them in detail. State whether they were pre-specified for the review and, if applicable, whether they were primary/main or secondary/additional outcomes. Give the principal measures of effect (such as risk ratio, hazard ratio, difference in means) used for each outcome.                                                                    | 13-16            |
| Synthesis methods                              | 14      | Describe the meta-analysis methods used to synthesise IPD. Specify any statistical methods and models used. Issues should include (but are not restricted to): <ul style="list-style-type: none"> <li>• Use of a one-stage or two-stage approach.</li> <li>• How effect estimates were generated separately within each study and combined across studies (where applicable).</li> </ul>                                                | 13-16            |

| PRISMA-IPD Section/topic            | Item No | Checklist item                                                                                                                                                                                                                                                                                                                                                                                                                                                                                                                                                                                                                                                                    | Reported on page |
|-------------------------------------|---------|-----------------------------------------------------------------------------------------------------------------------------------------------------------------------------------------------------------------------------------------------------------------------------------------------------------------------------------------------------------------------------------------------------------------------------------------------------------------------------------------------------------------------------------------------------------------------------------------------------------------------------------------------------------------------------------|------------------|
| <b>Title</b>                        |         |                                                                                                                                                                                                                                                                                                                                                                                                                                                                                                                                                                                                                                                                                   |                  |
|                                     |         | <ul style="list-style-type: none"> <li>• Specification of one-stage models (where applicable) including how clustering of patients within studies was accounted for.</li> <li>• Use of fixed or random effects models and any other model assumptions, such as proportional hazards.</li> <li>• How (summary) survival curves were generated (where applicable).</li> <li>• Methods for quantifying statistical heterogeneity (such as <math>I^2</math> and <math>\tau^2</math>).</li> <li>• How studies providing IPD and not providing IPD were analysed together (where applicable).</li> <li>• How missing data within the IPD were dealt with (where applicable).</li> </ul> |                  |
| Exploration of variation in effects | A2      | If applicable, describe any methods used to explore variation in effects by study or participant level characteristics (such as estimation of interactions between effect and covariates). State all participant-level characteristics that were analysed as potential effect modifiers, and whether these were pre-specified.                                                                                                                                                                                                                                                                                                                                                    | 13-16            |
| Risk of bias across studies         | 15      | Specify any assessment of risk of bias relating to the accumulated body of evidence, including any pertaining to not obtaining IPD for particular studies, outcomes or other variables.                                                                                                                                                                                                                                                                                                                                                                                                                                                                                           | 10, 16           |
| Additional analyses                 | 16      | Describe methods of any additional analyses, including sensitivity analyses. State which of these were pre-specified.                                                                                                                                                                                                                                                                                                                                                                                                                                                                                                                                                             | 8, 16-17         |
| <b>Results</b>                      |         |                                                                                                                                                                                                                                                                                                                                                                                                                                                                                                                                                                                                                                                                                   |                  |
| Study selection and IPD obtained    | 17      | Give numbers of studies screened, assessed for eligibility, and included in the systematic review with reasons for exclusions at each stage. Indicate the number of studies and participants for which IPD were sought and for which IPD were obtained. For those studies where IPD were not available, give the numbers of studies and participants for which aggregate data were available. Report reasons for non-availability of IPD. Include a flow diagram.                                                                                                                                                                                                                 | TBA              |
| Study characteristics               | 18      | For each study, present information on key study and participant characteristics (such as description of interventions, numbers of participants, demographic data, unavailability of outcomes, funding source, and if applicable duration of follow-up). Provide (main) citations for each study. Where applicable, also report similar study characteristics for any studies not providing IPD.                                                                                                                                                                                                                                                                                  | TBA              |
| IPD integrity                       | A3      | Report any important issues identified in checking IPD or state that there were none.                                                                                                                                                                                                                                                                                                                                                                                                                                                                                                                                                                                             | TBA              |
| Risk of bias within studies         | 19      | Present data on risk of bias assessments. If applicable, describe whether data checking led to the up-weighting or down-weighting of these assessments. Consider how any potential bias impacts on the robustness of meta-analysis conclusions.                                                                                                                                                                                                                                                                                                                                                                                                                                   | TBA              |
| Results of individual studies       | 20      | For each comparison and for each main outcome (benefit or harm), for each individual study report the number of eligible participants for which data were obtained and show simple summary data for each intervention group (including, where applicable, the number of events), effect estimates and confidence intervals. These may be tabulated or included on a forest                                                                                                                                                                                                                                                                                                        | TBA              |

| PRISMA-IPD Section/topic    | Item No | Checklist item                                                                                                                                                                                                                                                                                                                          | Reported on page |
|-----------------------------|---------|-----------------------------------------------------------------------------------------------------------------------------------------------------------------------------------------------------------------------------------------------------------------------------------------------------------------------------------------|------------------|
| <b>Title</b>                |         |                                                                                                                                                                                                                                                                                                                                         |                  |
|                             |         | plot.                                                                                                                                                                                                                                                                                                                                   |                  |
| Results of syntheses        | 21      | Present summary effects for each meta-analysis undertaken, including confidence intervals and measures of statistical heterogeneity. State whether the analysis was pre-specified, and report the numbers of studies and participants and, where applicable, the number of events on which it is based.                                 | TBA              |
|                             |         | When exploring variation in effects due to patient or study characteristics, present summary interaction estimates for each characteristic examined, including confidence intervals and measures of statistical heterogeneity. State whether the analysis was pre-specified. State whether any interaction is consistent across trials. |                  |
|                             |         | Provide a description of the direction and size of effect in terms meaningful to those who would put findings into practice.                                                                                                                                                                                                            |                  |
| Risk of bias across studies | 22      | Present results of any assessment of risk of bias relating to the accumulated body of evidence, including any pertaining to the availability and representativeness of available studies, outcomes or other variables.                                                                                                                  | TBA              |
| Additional analyses         | 23      | Give results of any additional analyses (e.g. sensitivity analyses). If applicable, this should also include any analyses that incorporate aggregate data for studies that do not have IPD. If applicable, summarise the main meta-analysis results following the inclusion or exclusion of studies for which IPD were not available.   | TBA              |
| <b>Discussion</b>           |         |                                                                                                                                                                                                                                                                                                                                         |                  |
| Summary of evidence         | 24      | Summarise the main findings, including the strength of evidence for each main outcome.                                                                                                                                                                                                                                                  | TBA              |
| Strengths and limitations   | 25      | Discuss any important strengths and limitations of the evidence including the benefits of access to IPD and any limitations arising from IPD that were not available.                                                                                                                                                                   | TBA              |
| Conclusions                 | 26      | Provide a general interpretation of the findings in the context of other evidence.                                                                                                                                                                                                                                                      | TBA              |
| Implications                | A4      | Consider relevance to key groups (such as policy makers, service providers and service users). Consider implications for future research.                                                                                                                                                                                               | TBA              |
| <b>Funding</b>              |         |                                                                                                                                                                                                                                                                                                                                         |                  |
| Funding                     | 27      | Describe sources of funding and other support (such as supply of IPD), and the role in the systematic review of those providing such support.                                                                                                                                                                                           | 20-21            |

1  
2 **A1 – A3 denote new items that are additional to standard PRISMA items. A4 has been created as a result of re-arranging content of the standard PRISMA**  
3 **statement to suit the way that systematic review IPD meta-analyses are reported.**  
4

5 © Reproduced with permission of the PRISMA IPD Group, which encourages sharing and reuse for non-commercial purposes  
6  
7  
8  
9  
10  
11  
12  
13  
14  
15  
16  
17  
18  
19  
20  
21  
22  
23  
24  
25  
26  
27  
28  
29  
30  
31  
32  
33  
34  
35  
36  
37  
38  
39  
40  
41  
42  
43  
44  
45  
46

For peer review only



1  
2  
3  
4  
5  
6  
7  
8  
9  
10  
11  
12  
13  
14  
15  
16  
17  
18  
19  
20  
21  
22  
23  
24  
25  
26  
27  
28  
29  
30  
31  
32  
33  
34  
35  
36  
37  
38  
39  
40  
41  
42  
43  
44  
45  
46

For peer review only
